# Supplementary material for: Spatial organization of the kelp microbiome at micron scales
Source: PubMed Central journal article supplement (PMC8944128; doi:10.1186/s40168-022-01235-w), 2022-03-24
Supplement: 40168_2022_1235_MOESM2_ESM.pdf [file 40168_2022_1235_MOESM2_ESM.pdf]

Collection date: 6/11/2017

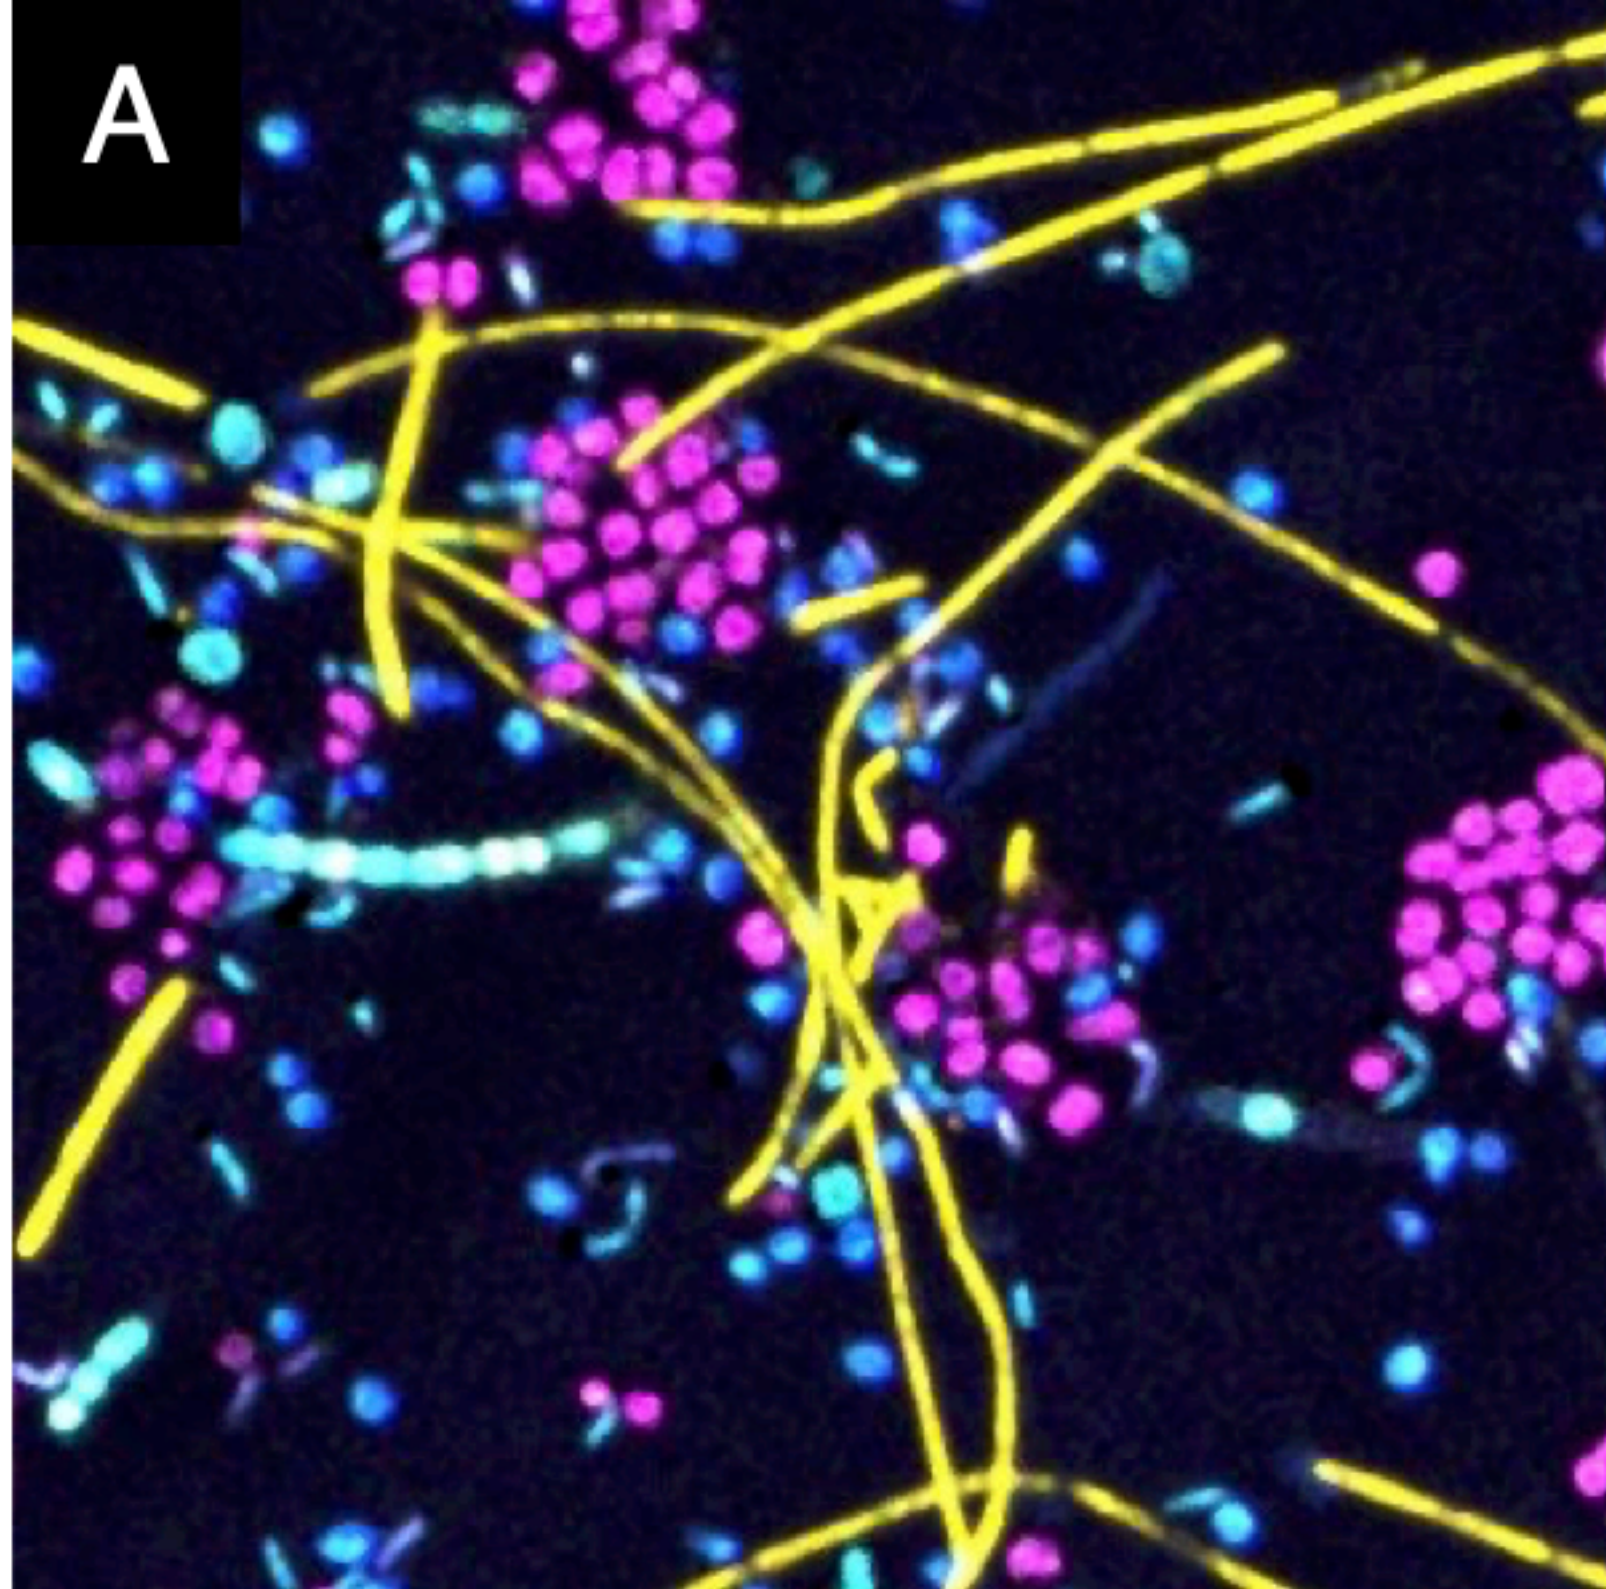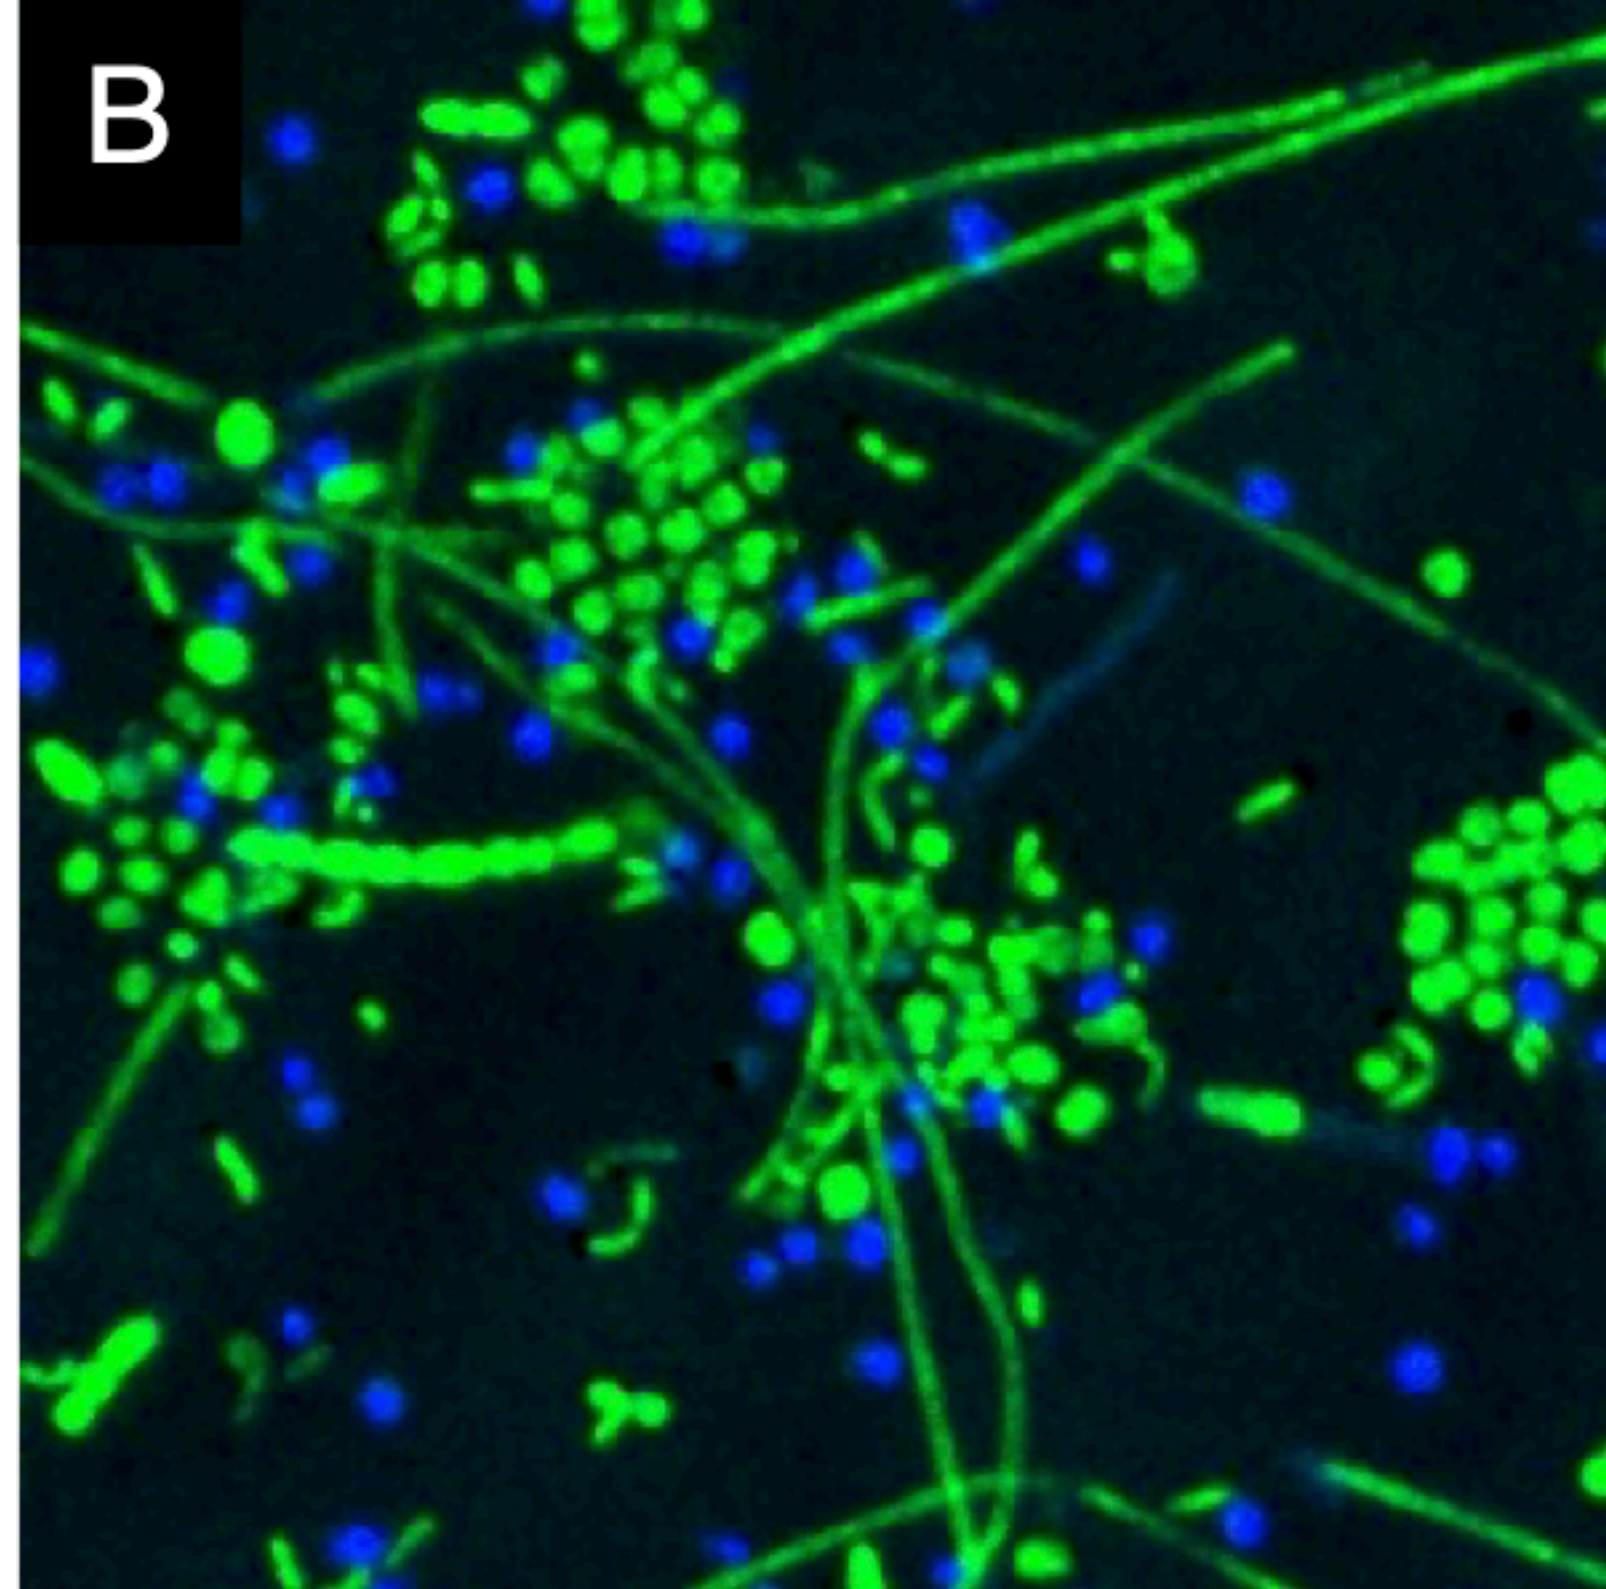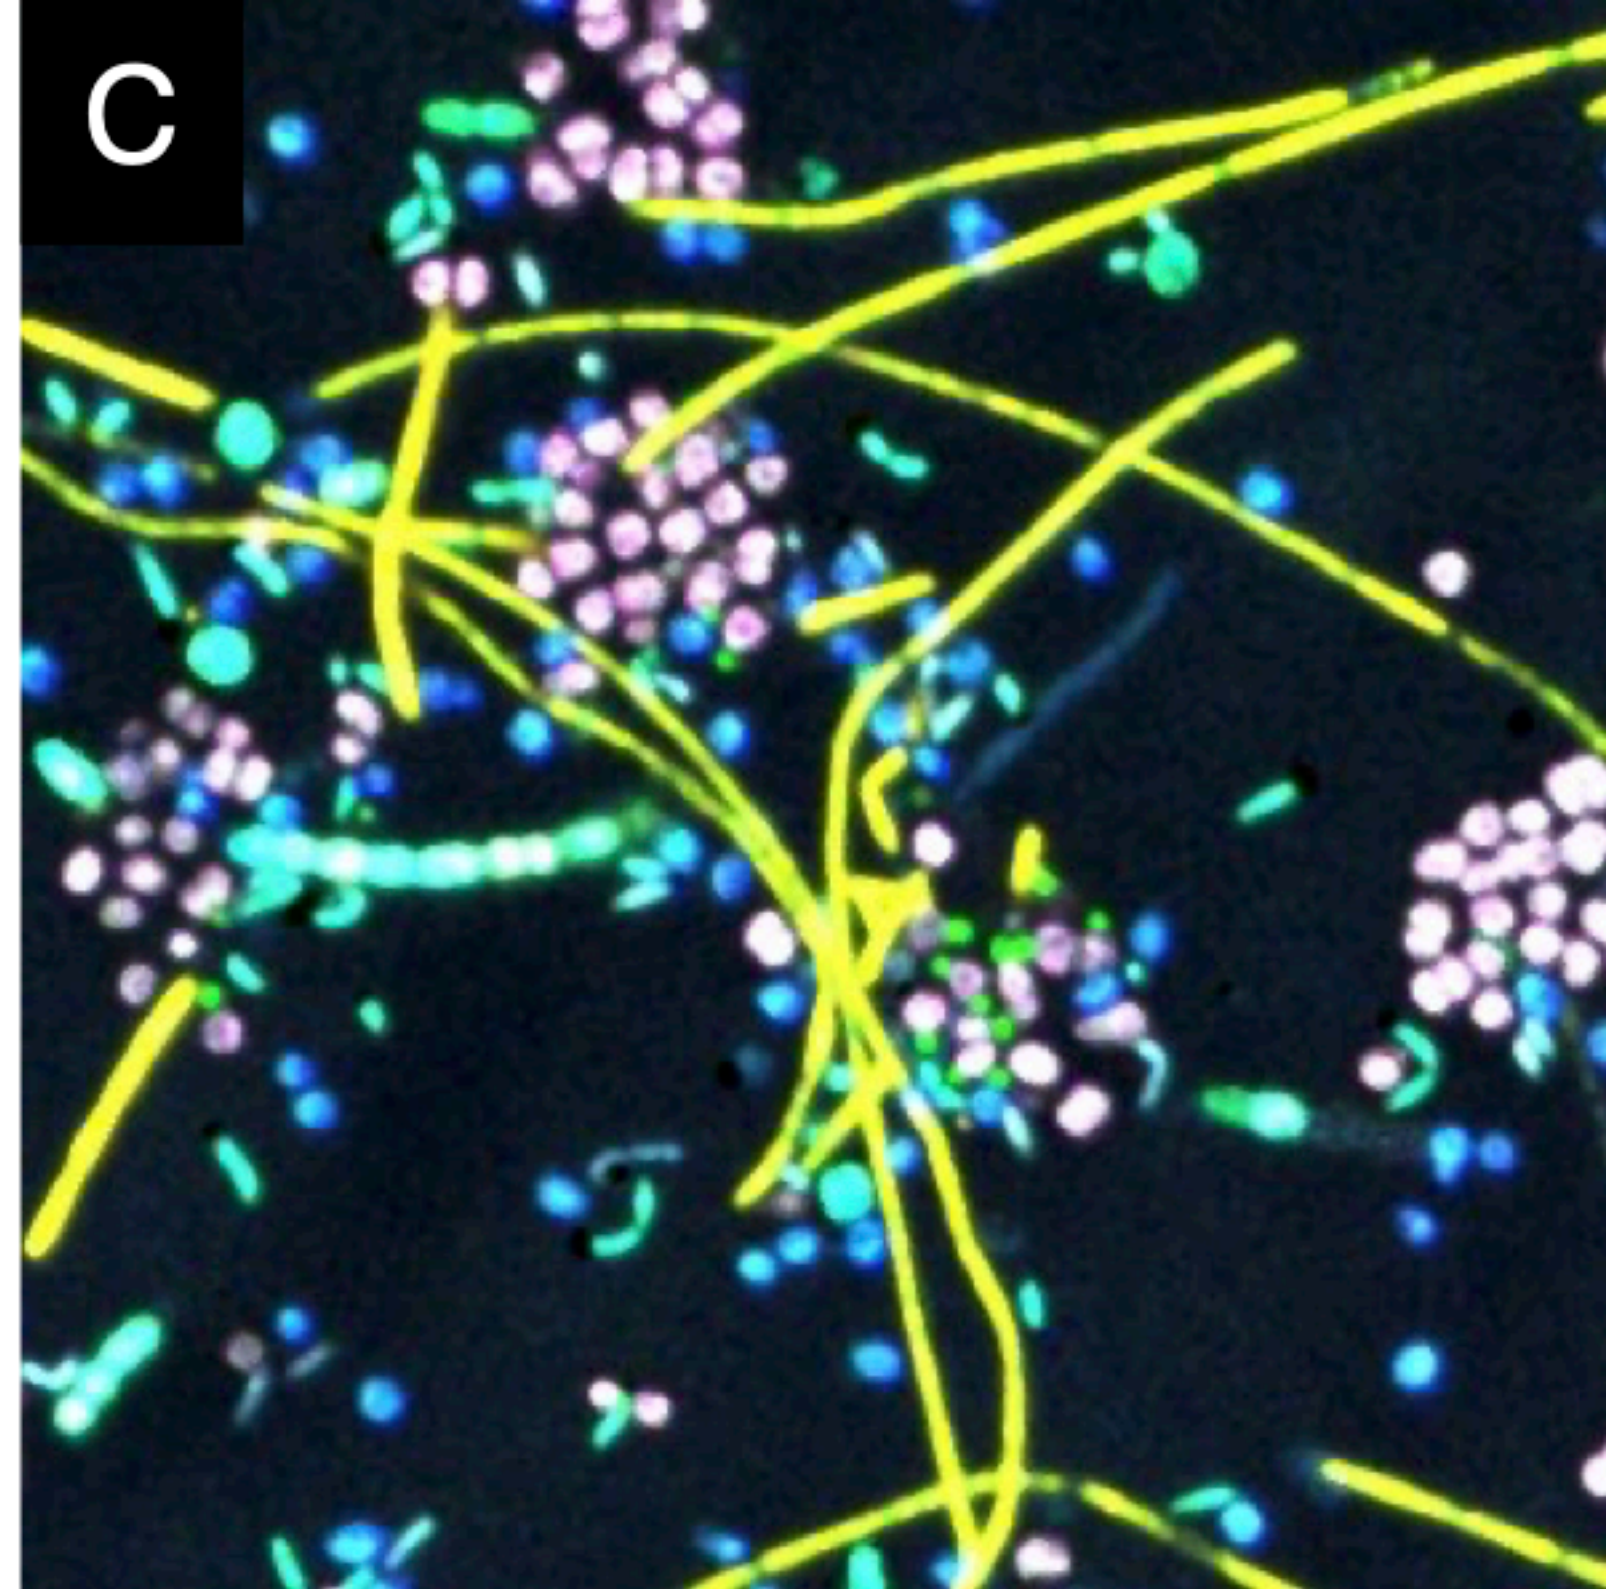

Collection date: 7/24/2017

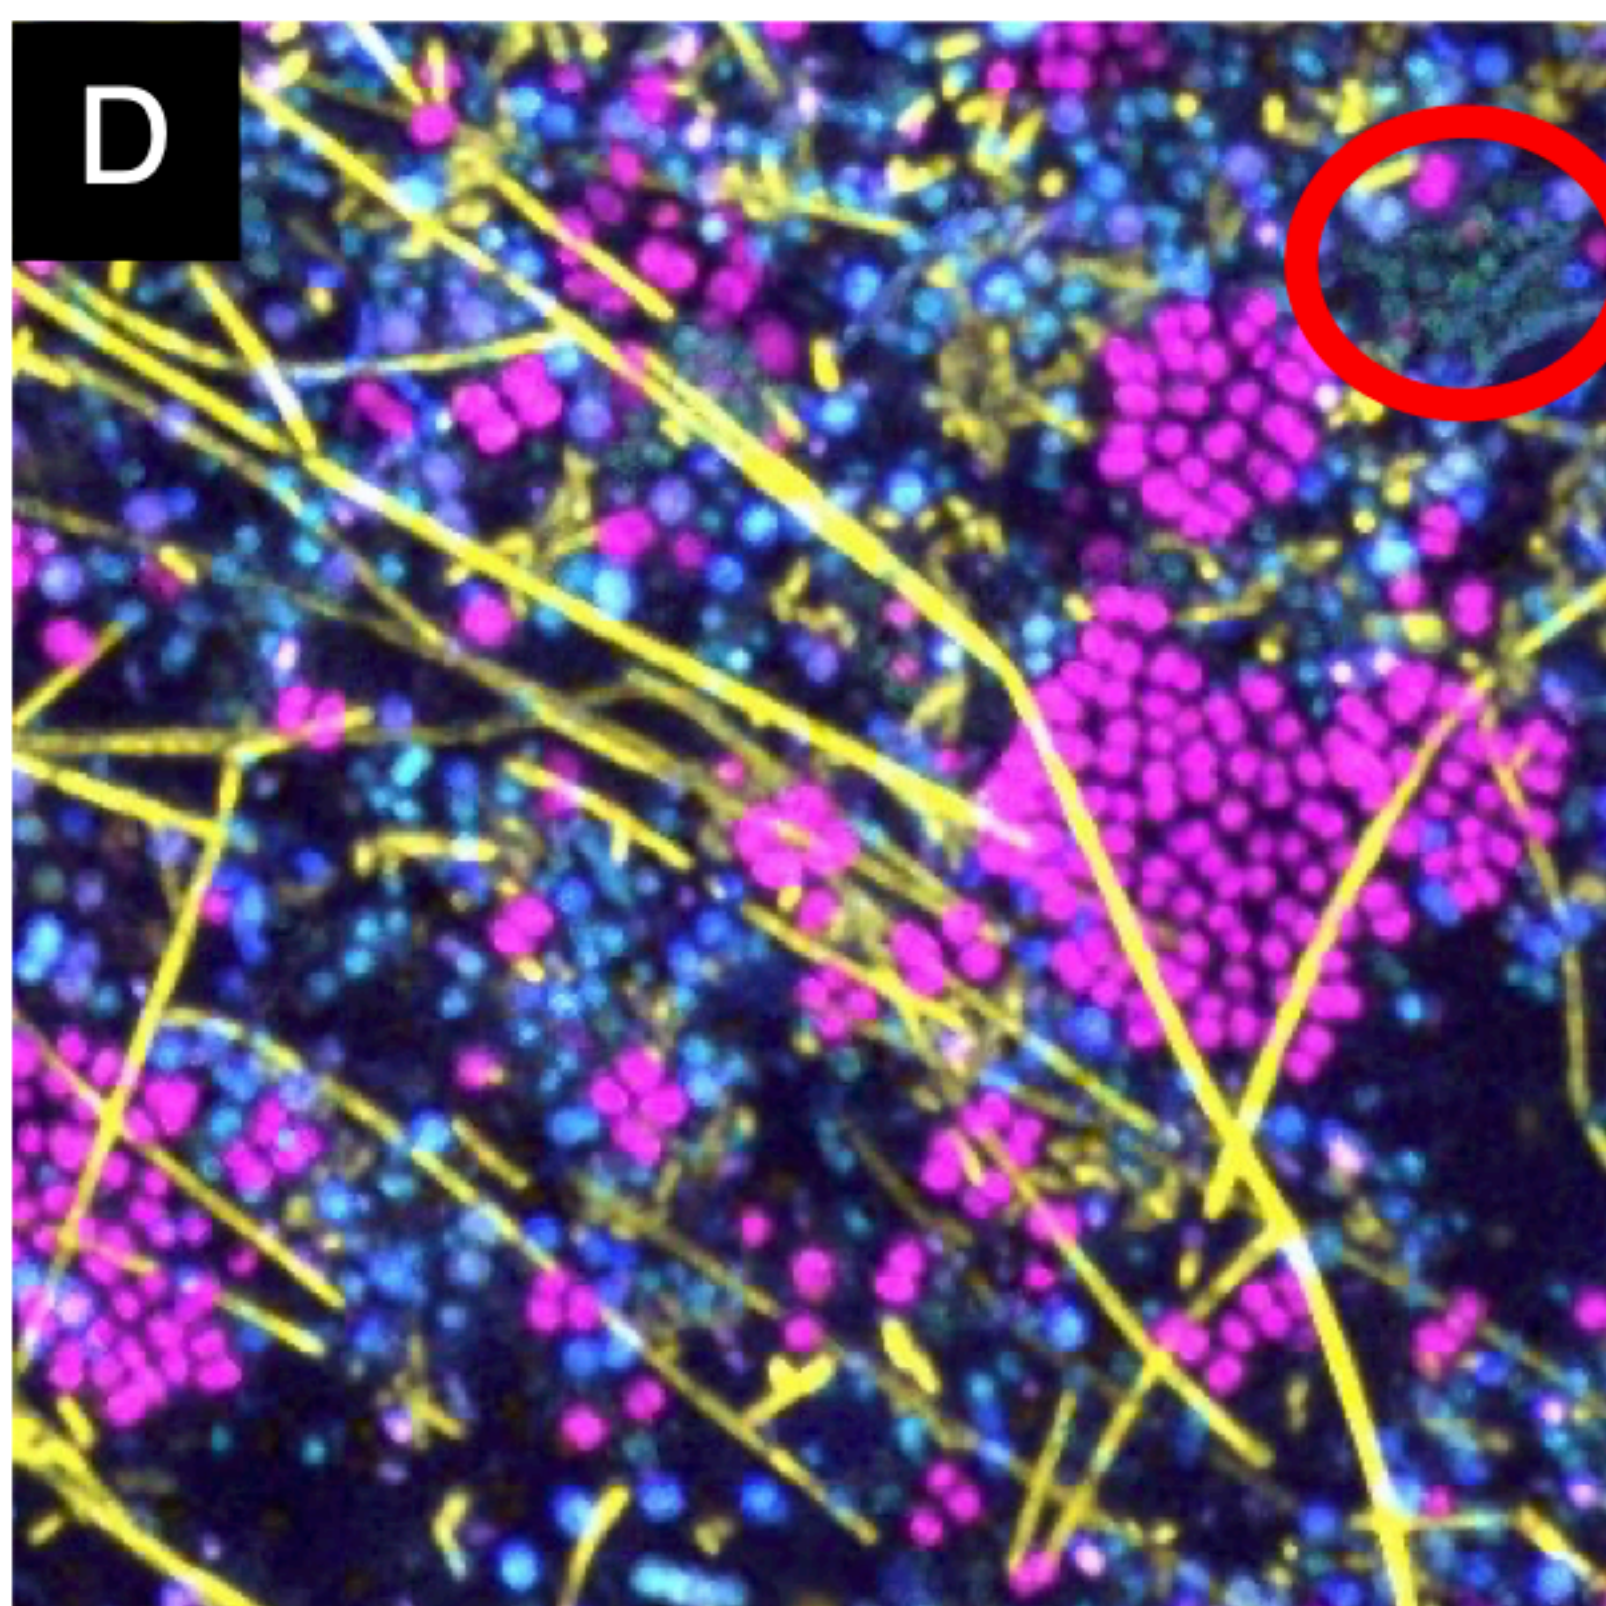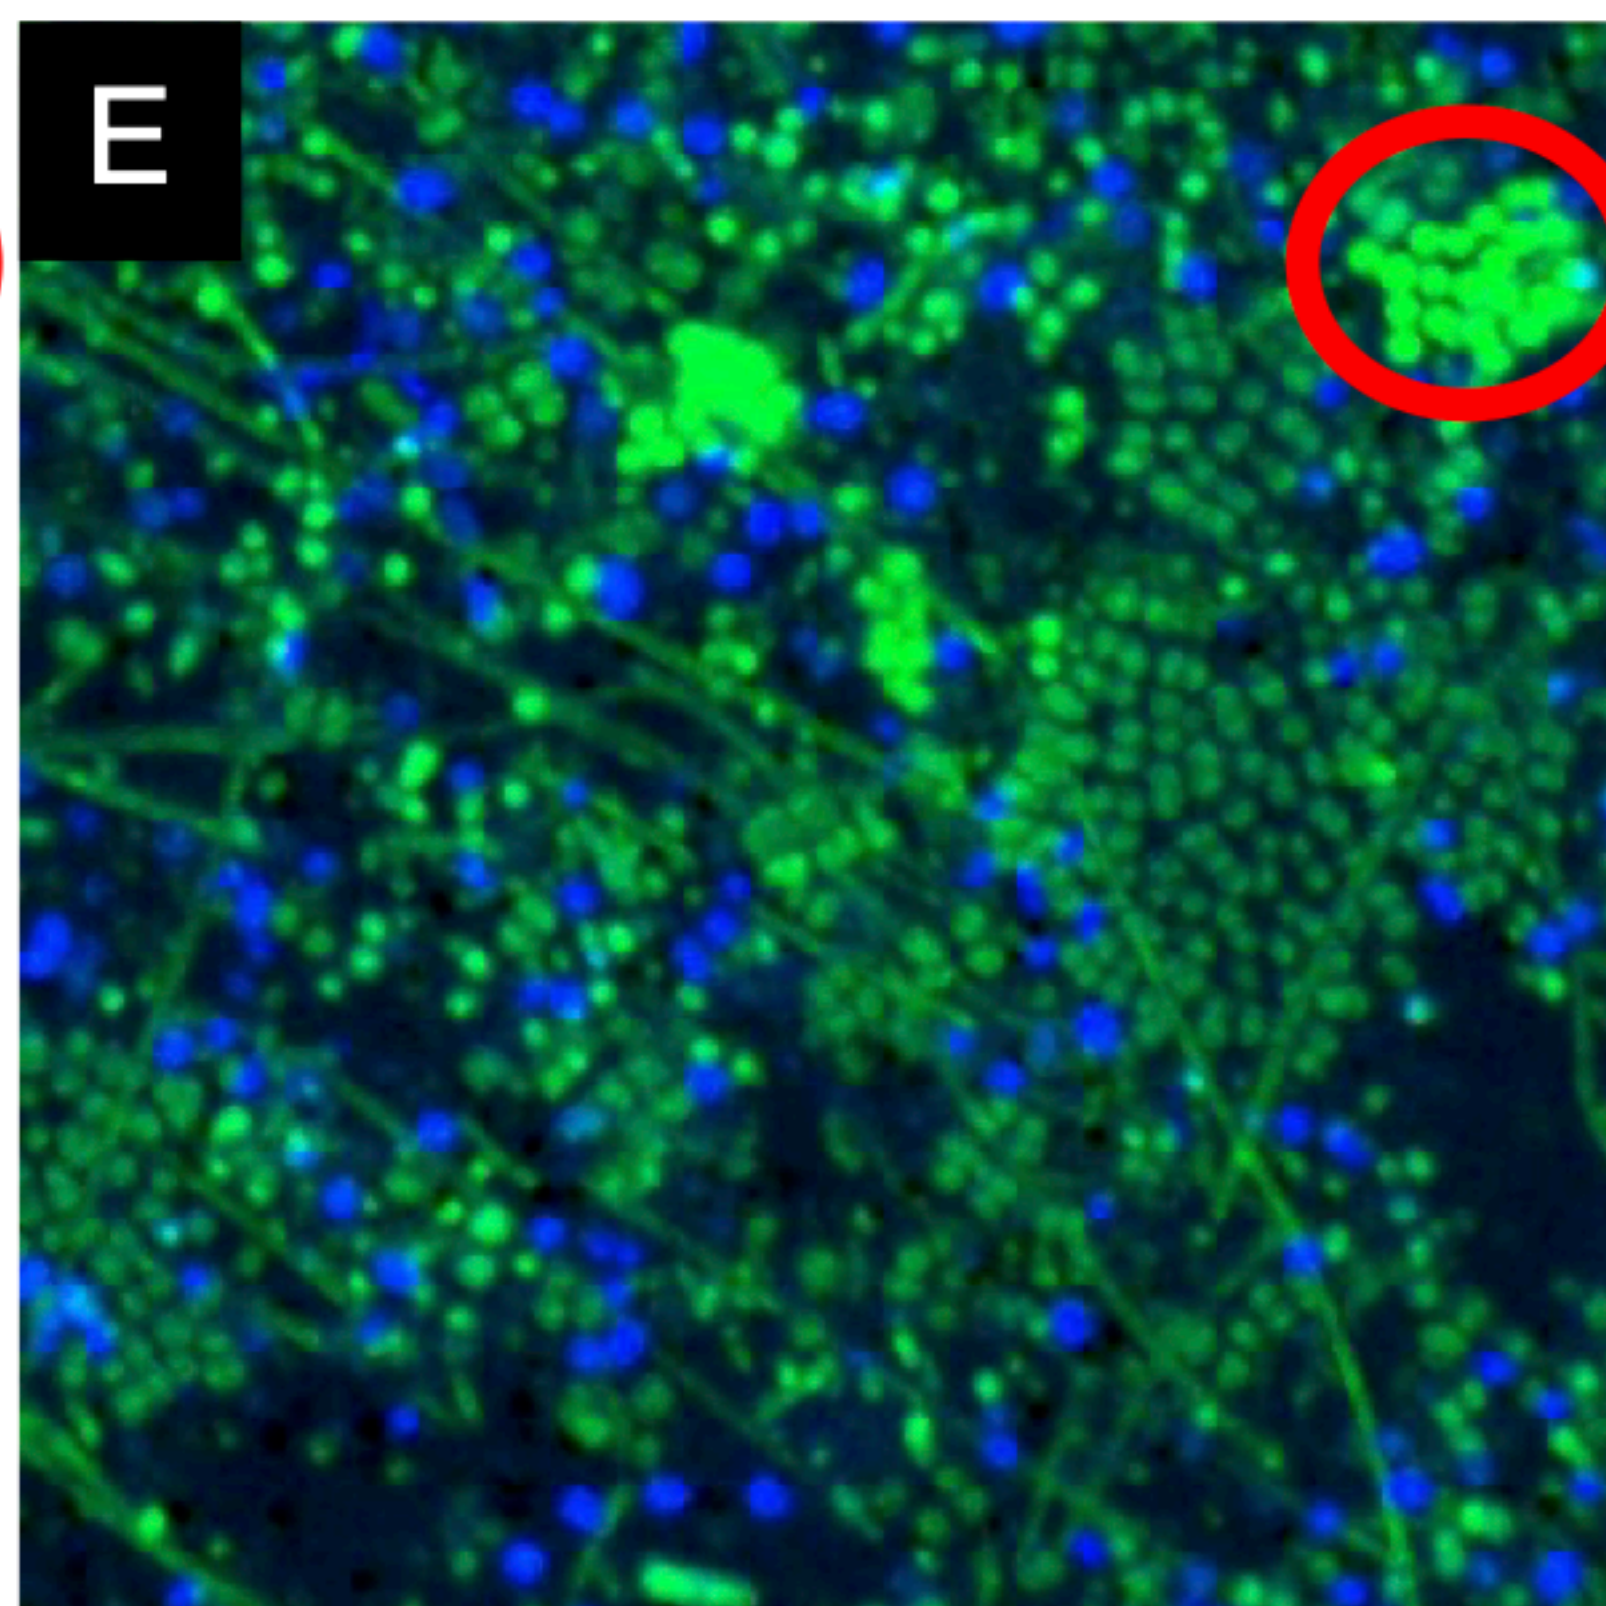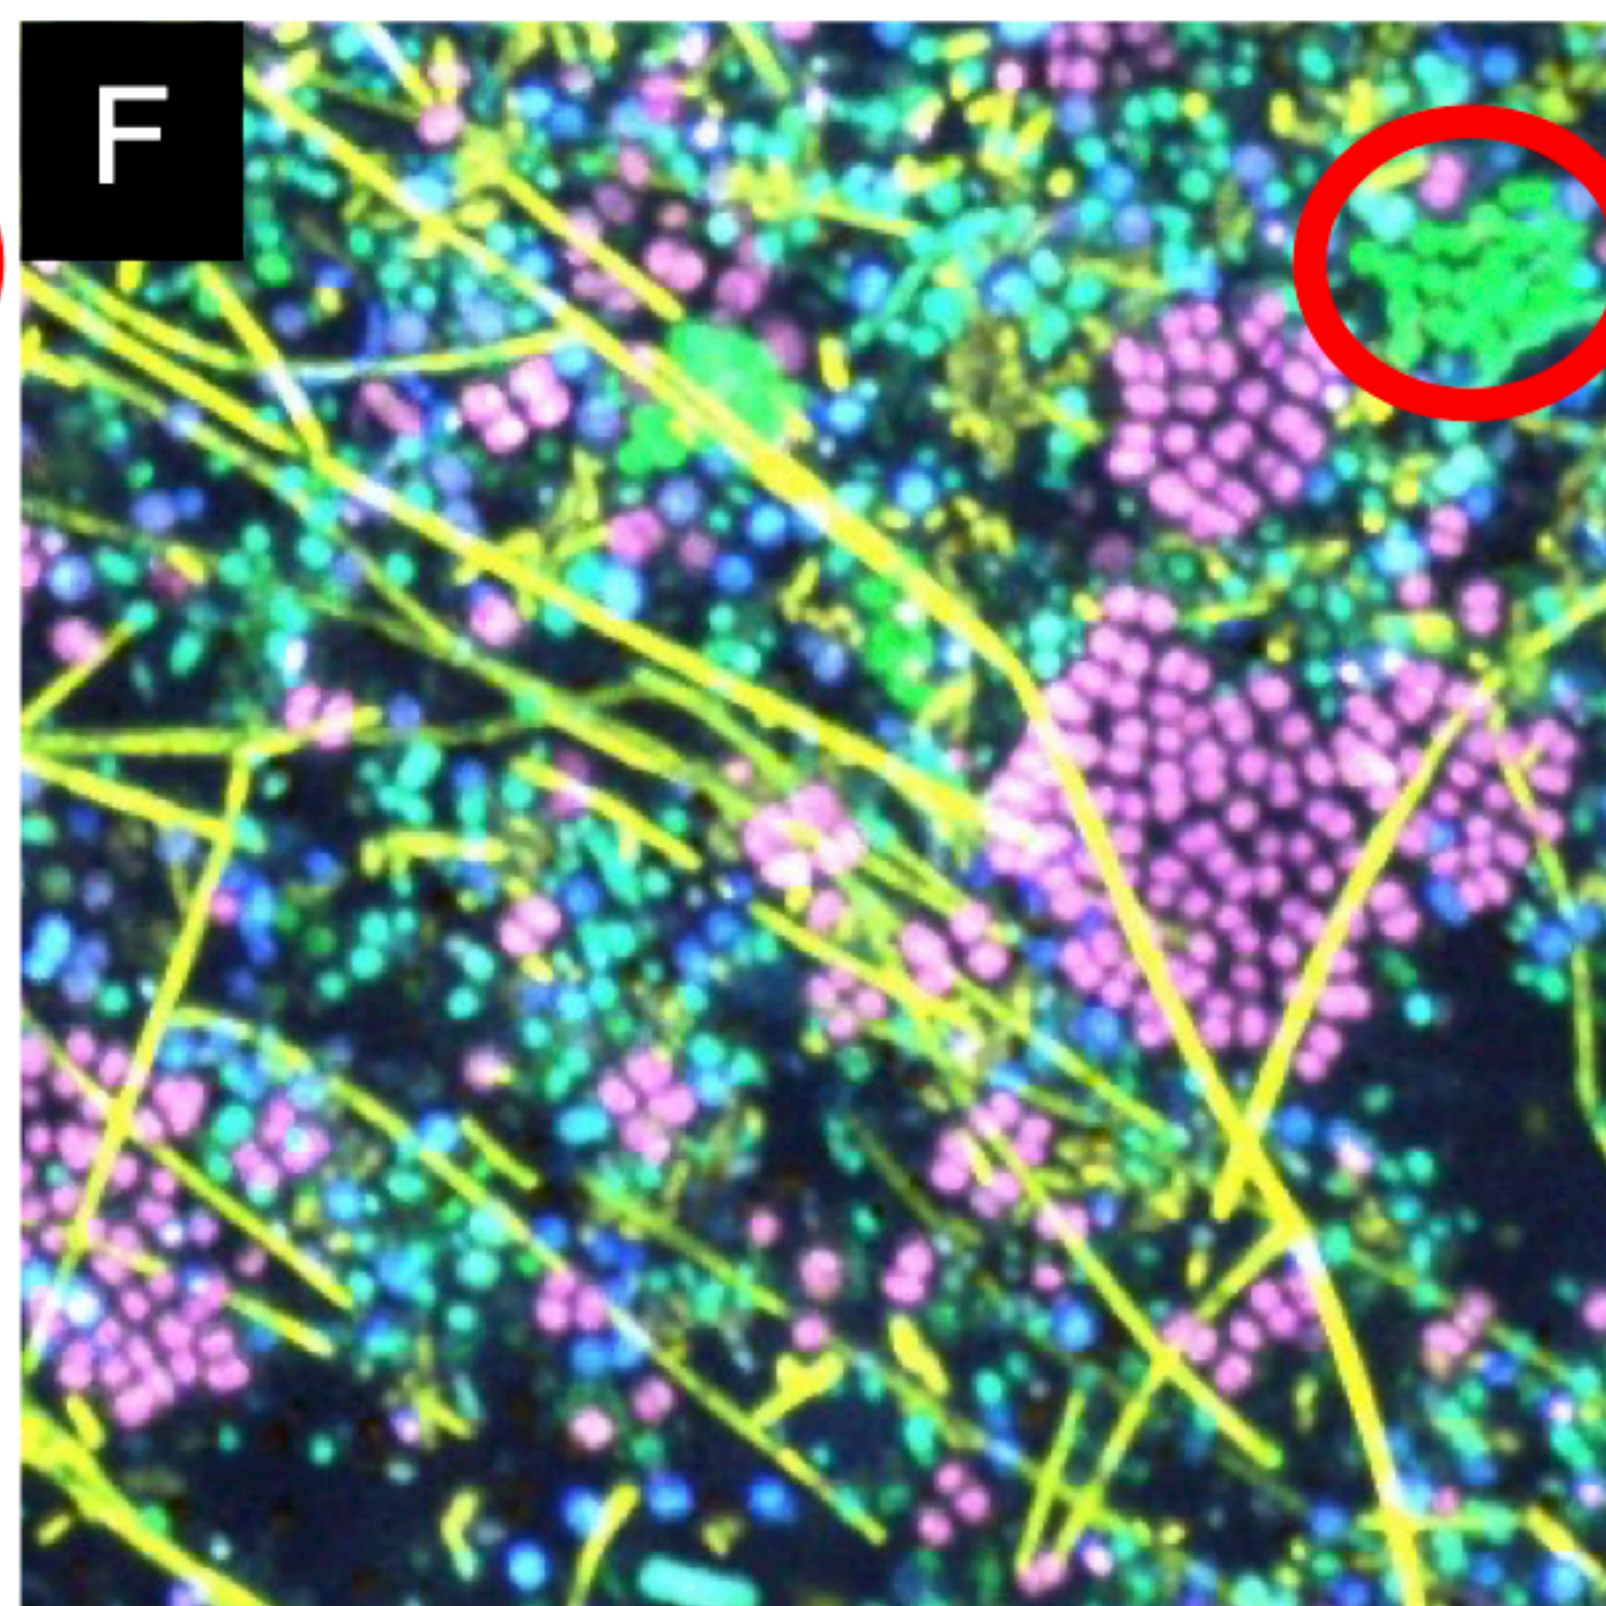

Collection date: 8/22/2017

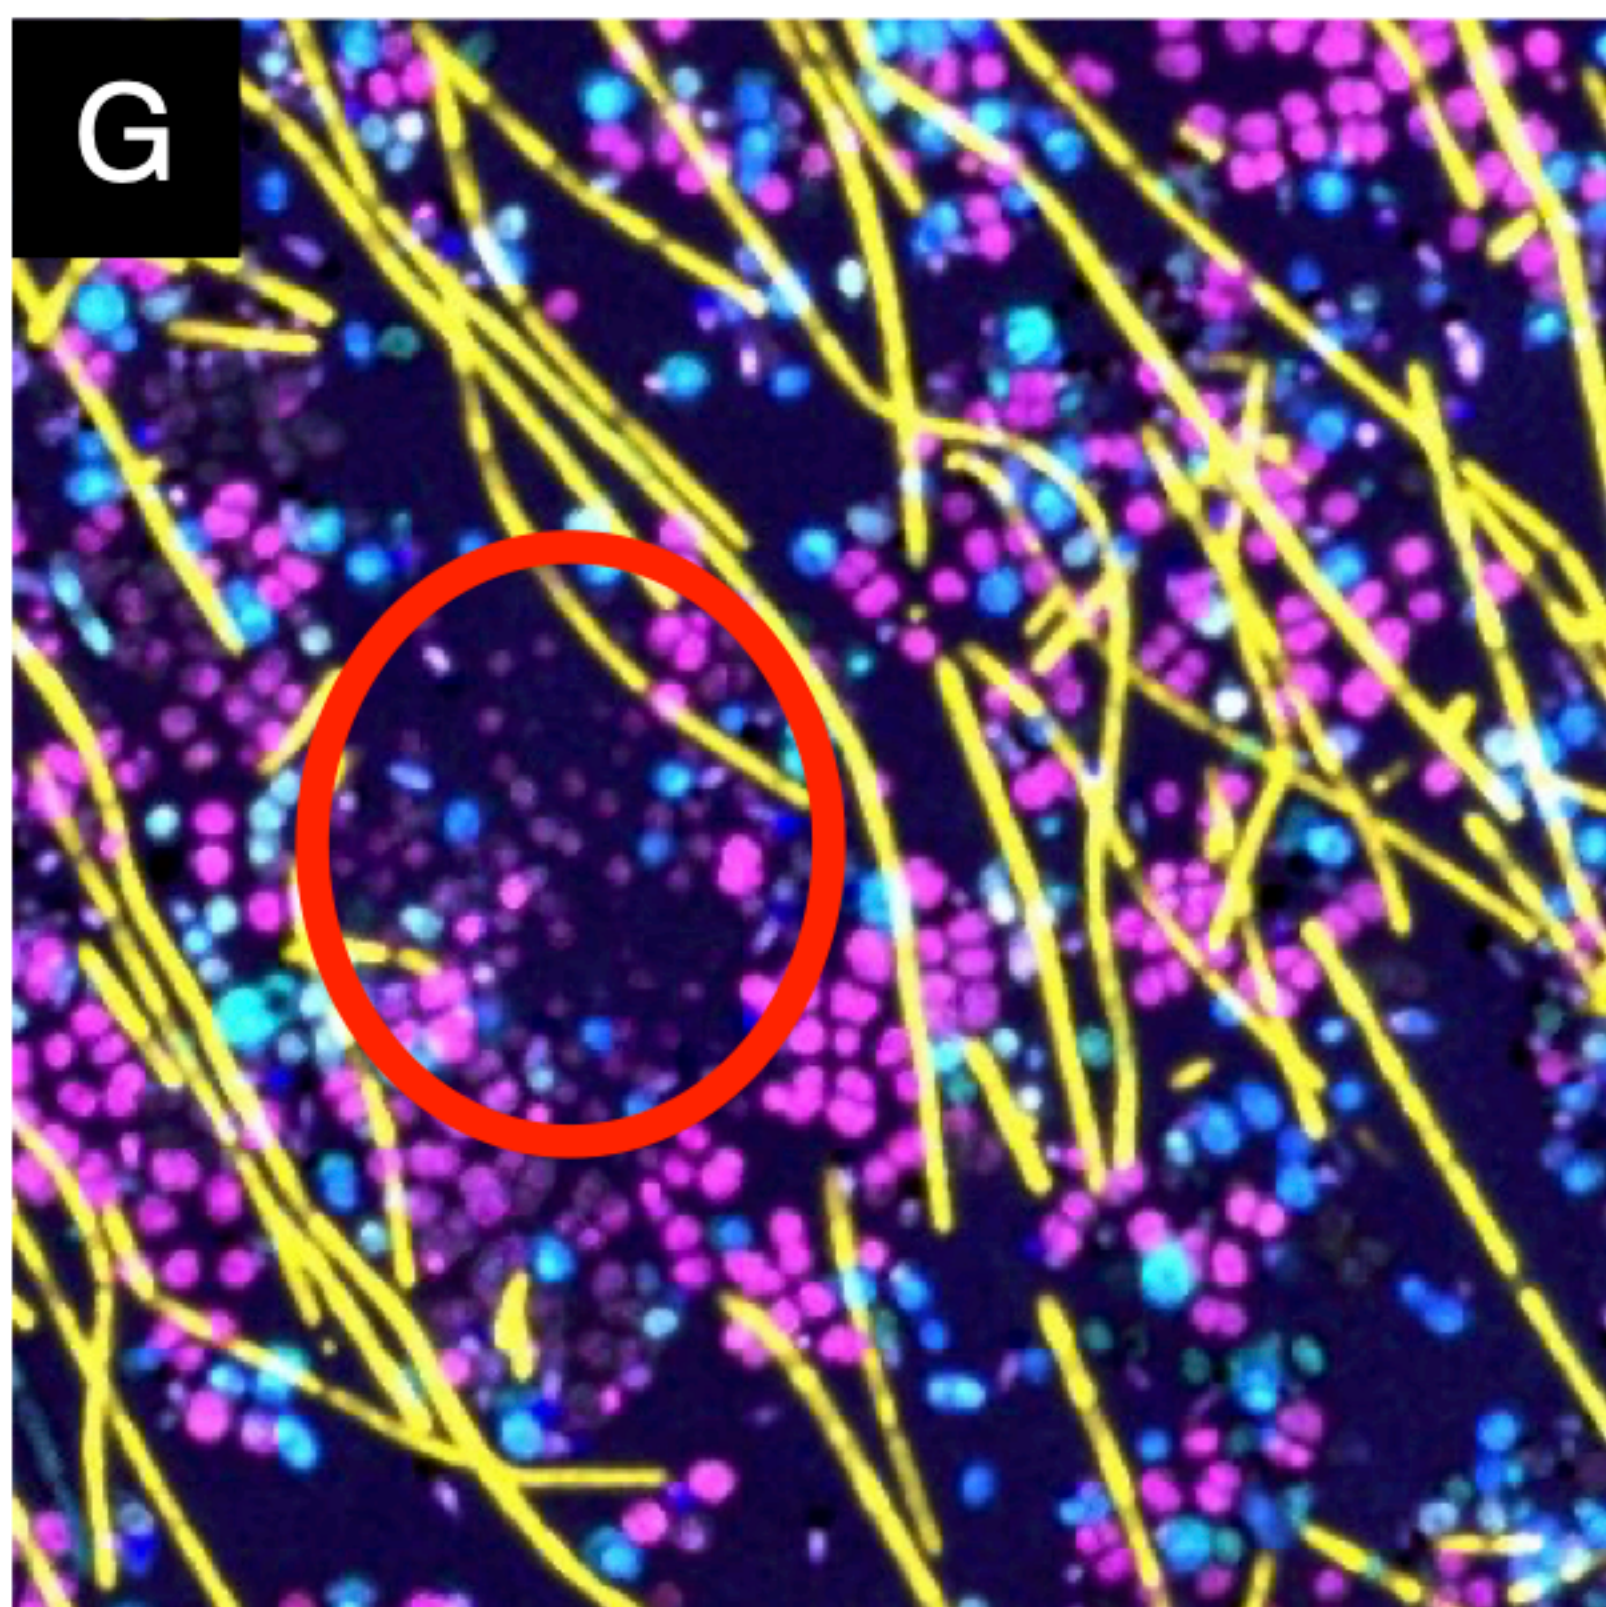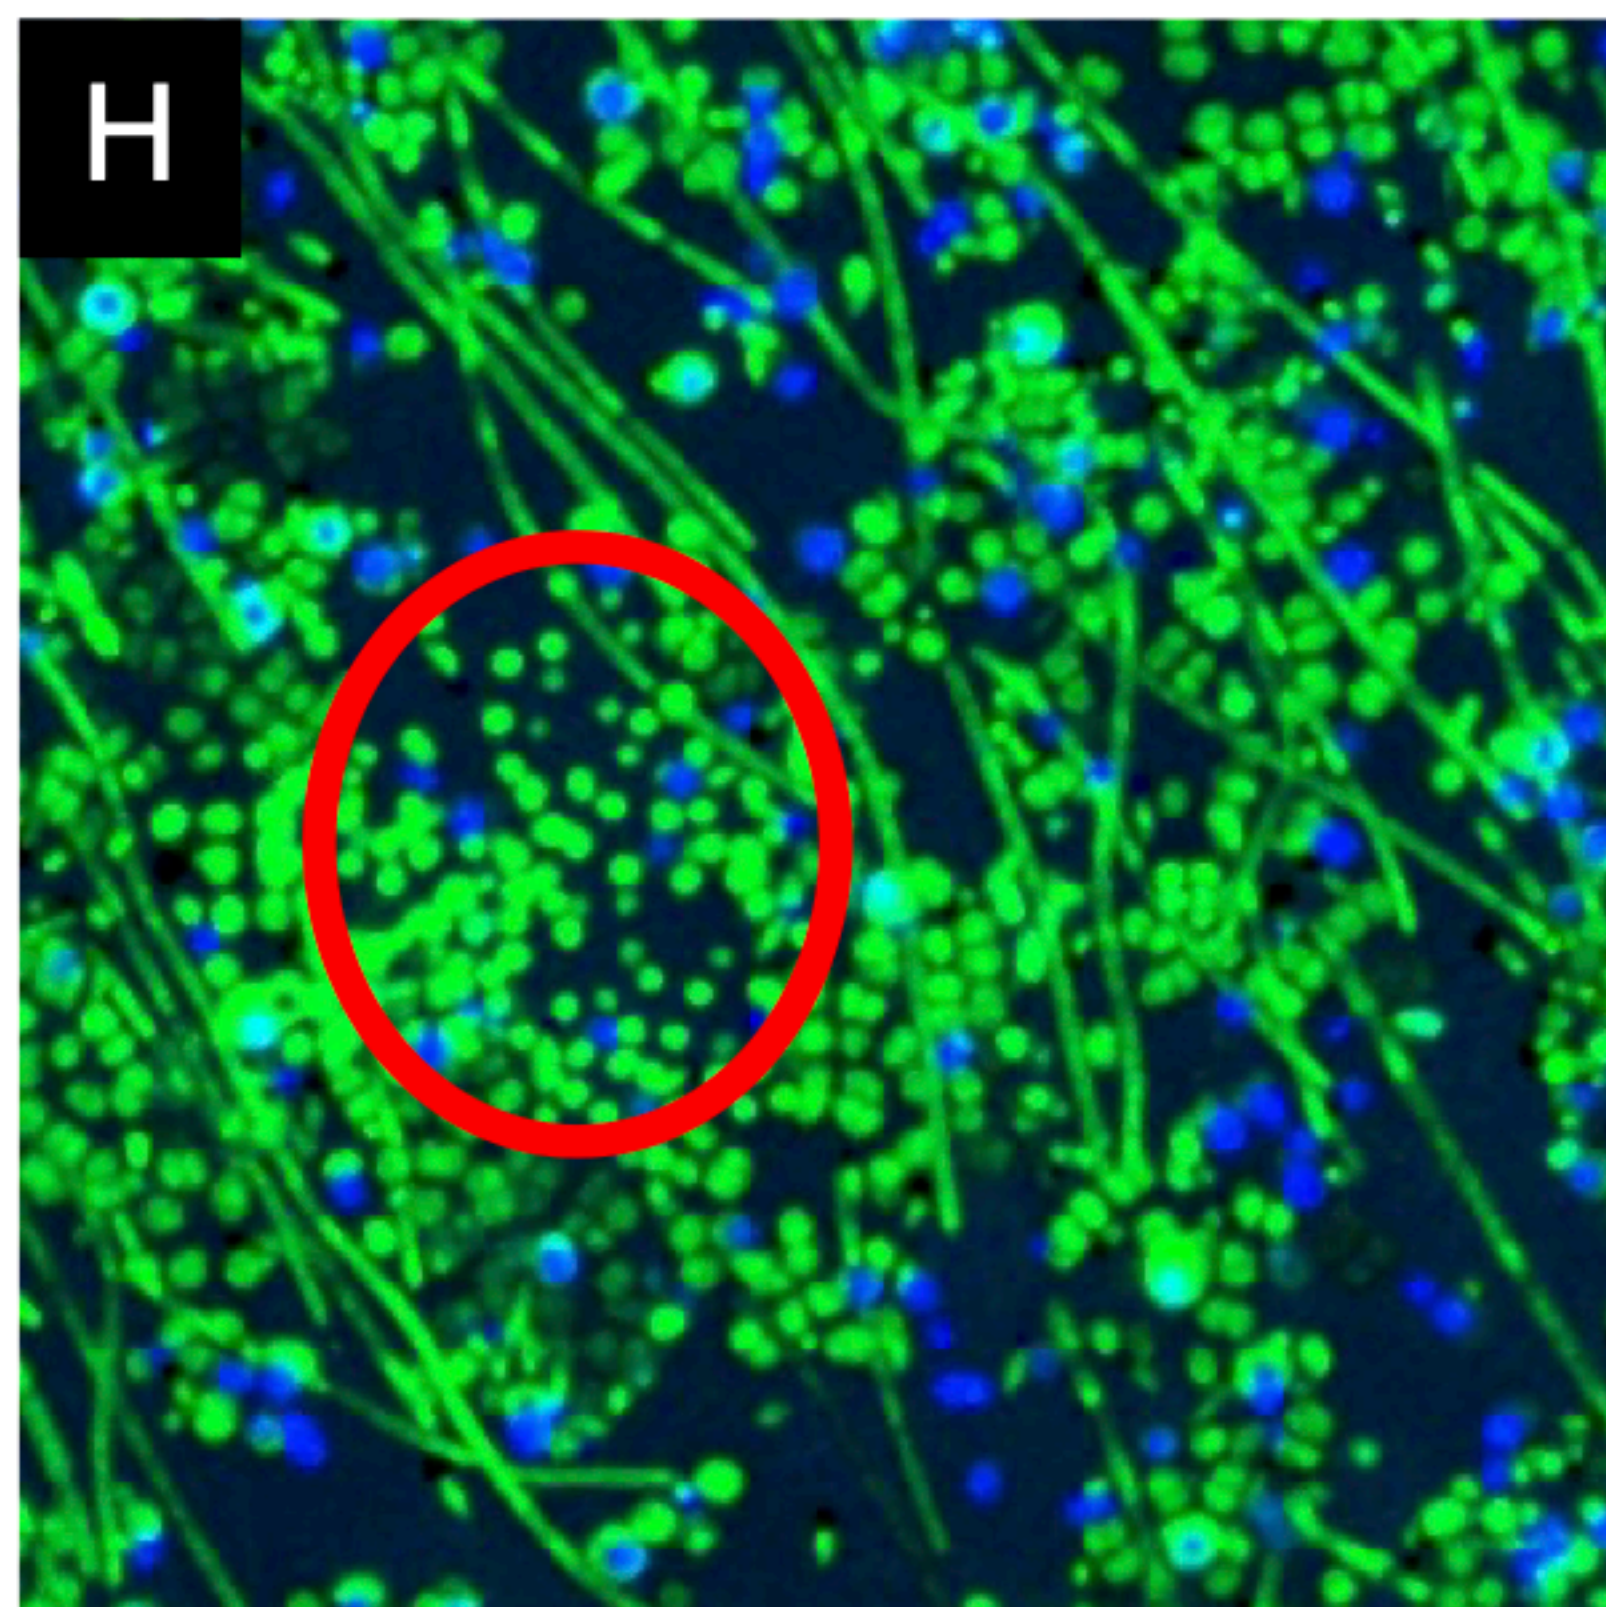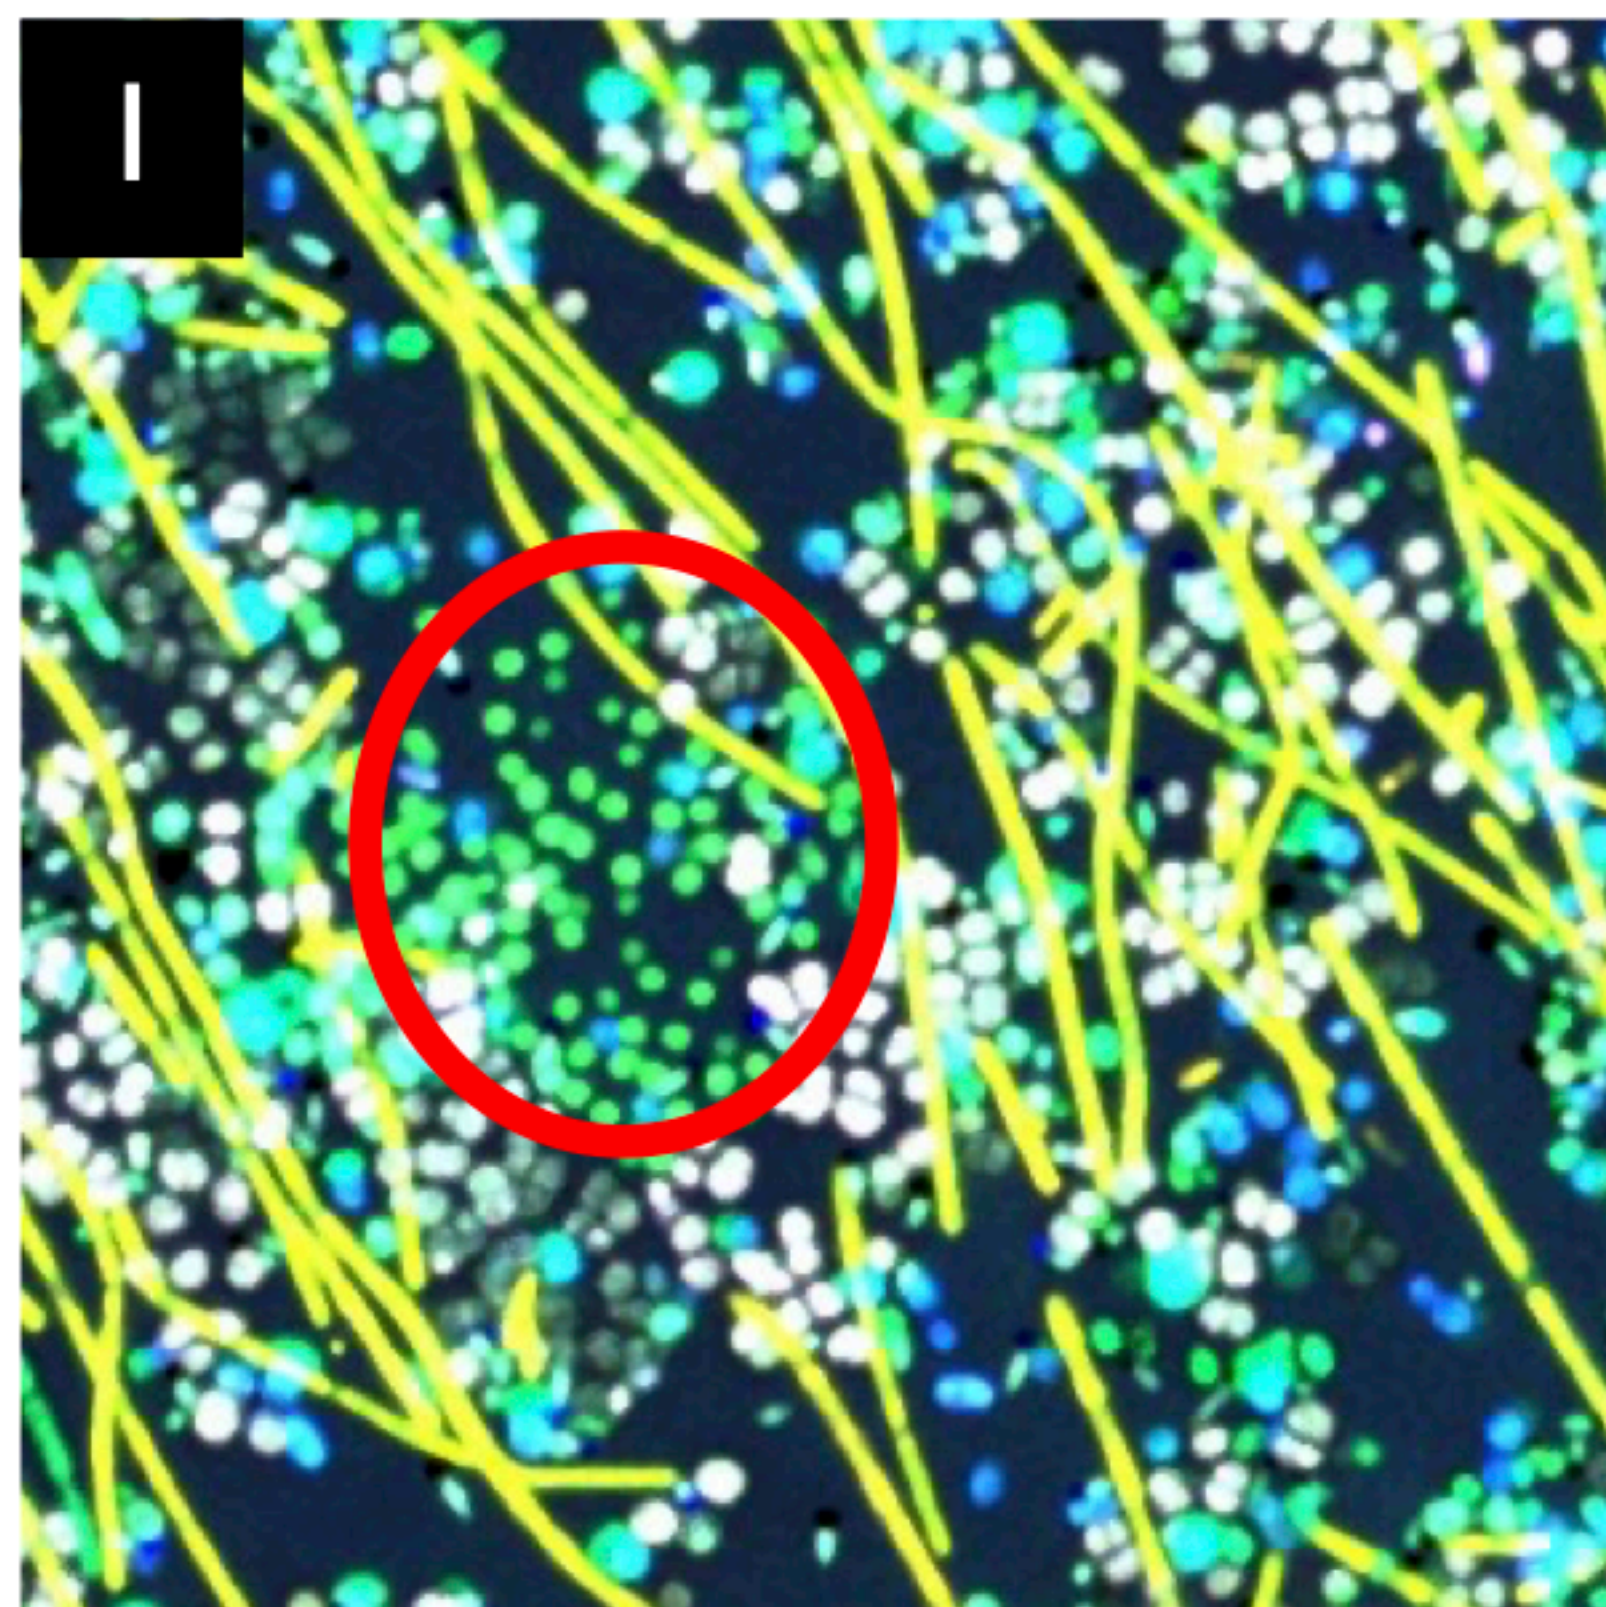

Alf968 (*Alphaproteobacteria*)  
Bac1058 (*Bacteroidetes*)  
Gran737 (*Granulosicoccus*)  
Eub338-II & -III  
(*Verrucomicrobia-Planctomycetes*)

Eub338-I (near-universal)  
Eub338-II & -III  
(*Verrucomicrobia-Planctomycetes*)

Overlay
