# Supplementary material for: Spatial organization of the kelp microbiome at micron scales
Source: PubMed Central journal article supplement (PMC8944128; doi:10.1186/s40168-022-01235-w), 2022-03-24

A

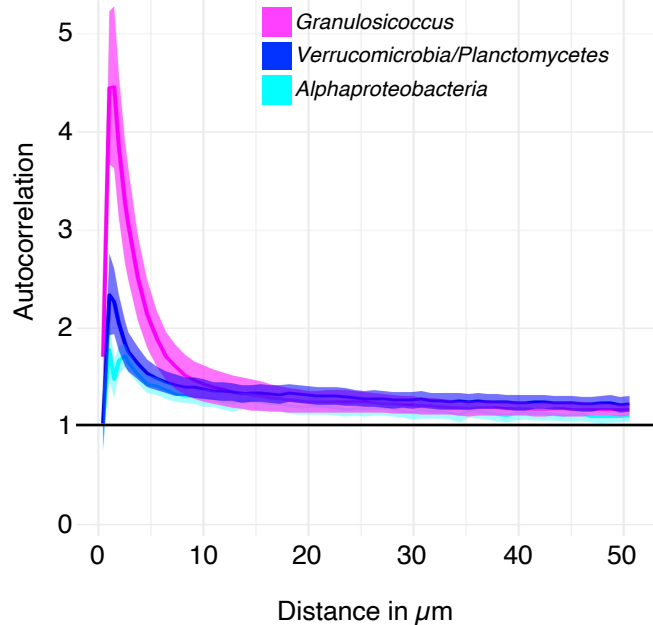

B

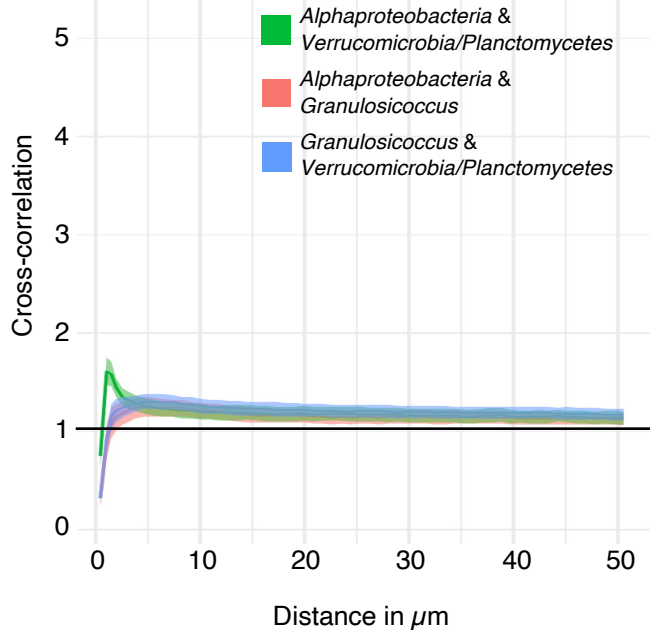

Supplement: 40168_2022_1235_MOESM7_ESM.pdf [file 40168_2022_1235_MOESM7_ESM.pdf]
