# Supplementary material for: Spatial organization of the kelp microbiome at micron scales
Source: PubMed Central journal article supplement (PMC8944128; doi:10.1186/s40168-022-01235-w), 2022-03-24
Supplement: 40168_2022_1235_MOESM8_ESM.pdf [file 40168_2022_1235_MOESM8_ESM.pdf]

|                                                                                     | Eub338-I<br>Atto 532 | Gam42<br>Cy5               | Gran737<br>TRX       | Alf968<br>Dy 490           | Bac1058<br>RRX       | Eub338-II-III<br>DY415                          |
|-------------------------------------------------------------------------------------|----------------------|----------------------------|----------------------|----------------------------|----------------------|-------------------------------------------------|
| <i>Gammaproteobact</i><br><i>eria</i><br><i>Granulosicoccus</i><br><i>coccoides</i> |                      |                            |                      |                            |                      |                                                 |
| <i>Gammaproteobact</i><br><i>eria</i><br><i>Vibrio</i> sp.                          |                      |                            |                      |                            |                      |                                                 |
| <i>Alphaproteobacteri</i><br><i>a</i><br><i>Hyphomonas</i> sp.                      |                      |                            |                      |                            |                      |                                                 |
| <i>Alphaproteobacteri</i><br><i>a</i><br><i>Rhodobacteraceae</i>                    |                      |                            |                      |                            |                      |                                                 |
| <i>Bacteroidetes</i><br><i>Flameovirgaceae</i>                                      |                      |                            |                      |                            |                      |                                                 |
|                                                                                     | Bacteria             | <i>Gammaproteobacteria</i> | Granulosicoccus spp. | <i>Alphaproteobacteria</i> | <i>Bacteroidetes</i> | <i>Planctomycetes</i><br><i>Verrucomicrobia</i> |
