# Supplementary material for: Spatial organization of the kelp microbiome at micron scales
Source: PubMed Central journal article supplement (PMC8944128; doi:10.1186/s40168-022-01235-w), 2022-03-24
Supplement: 40168_2022_1235_MOESM9_ESM.pdf [file 40168_2022_1235_MOESM9_ESM.pdf]

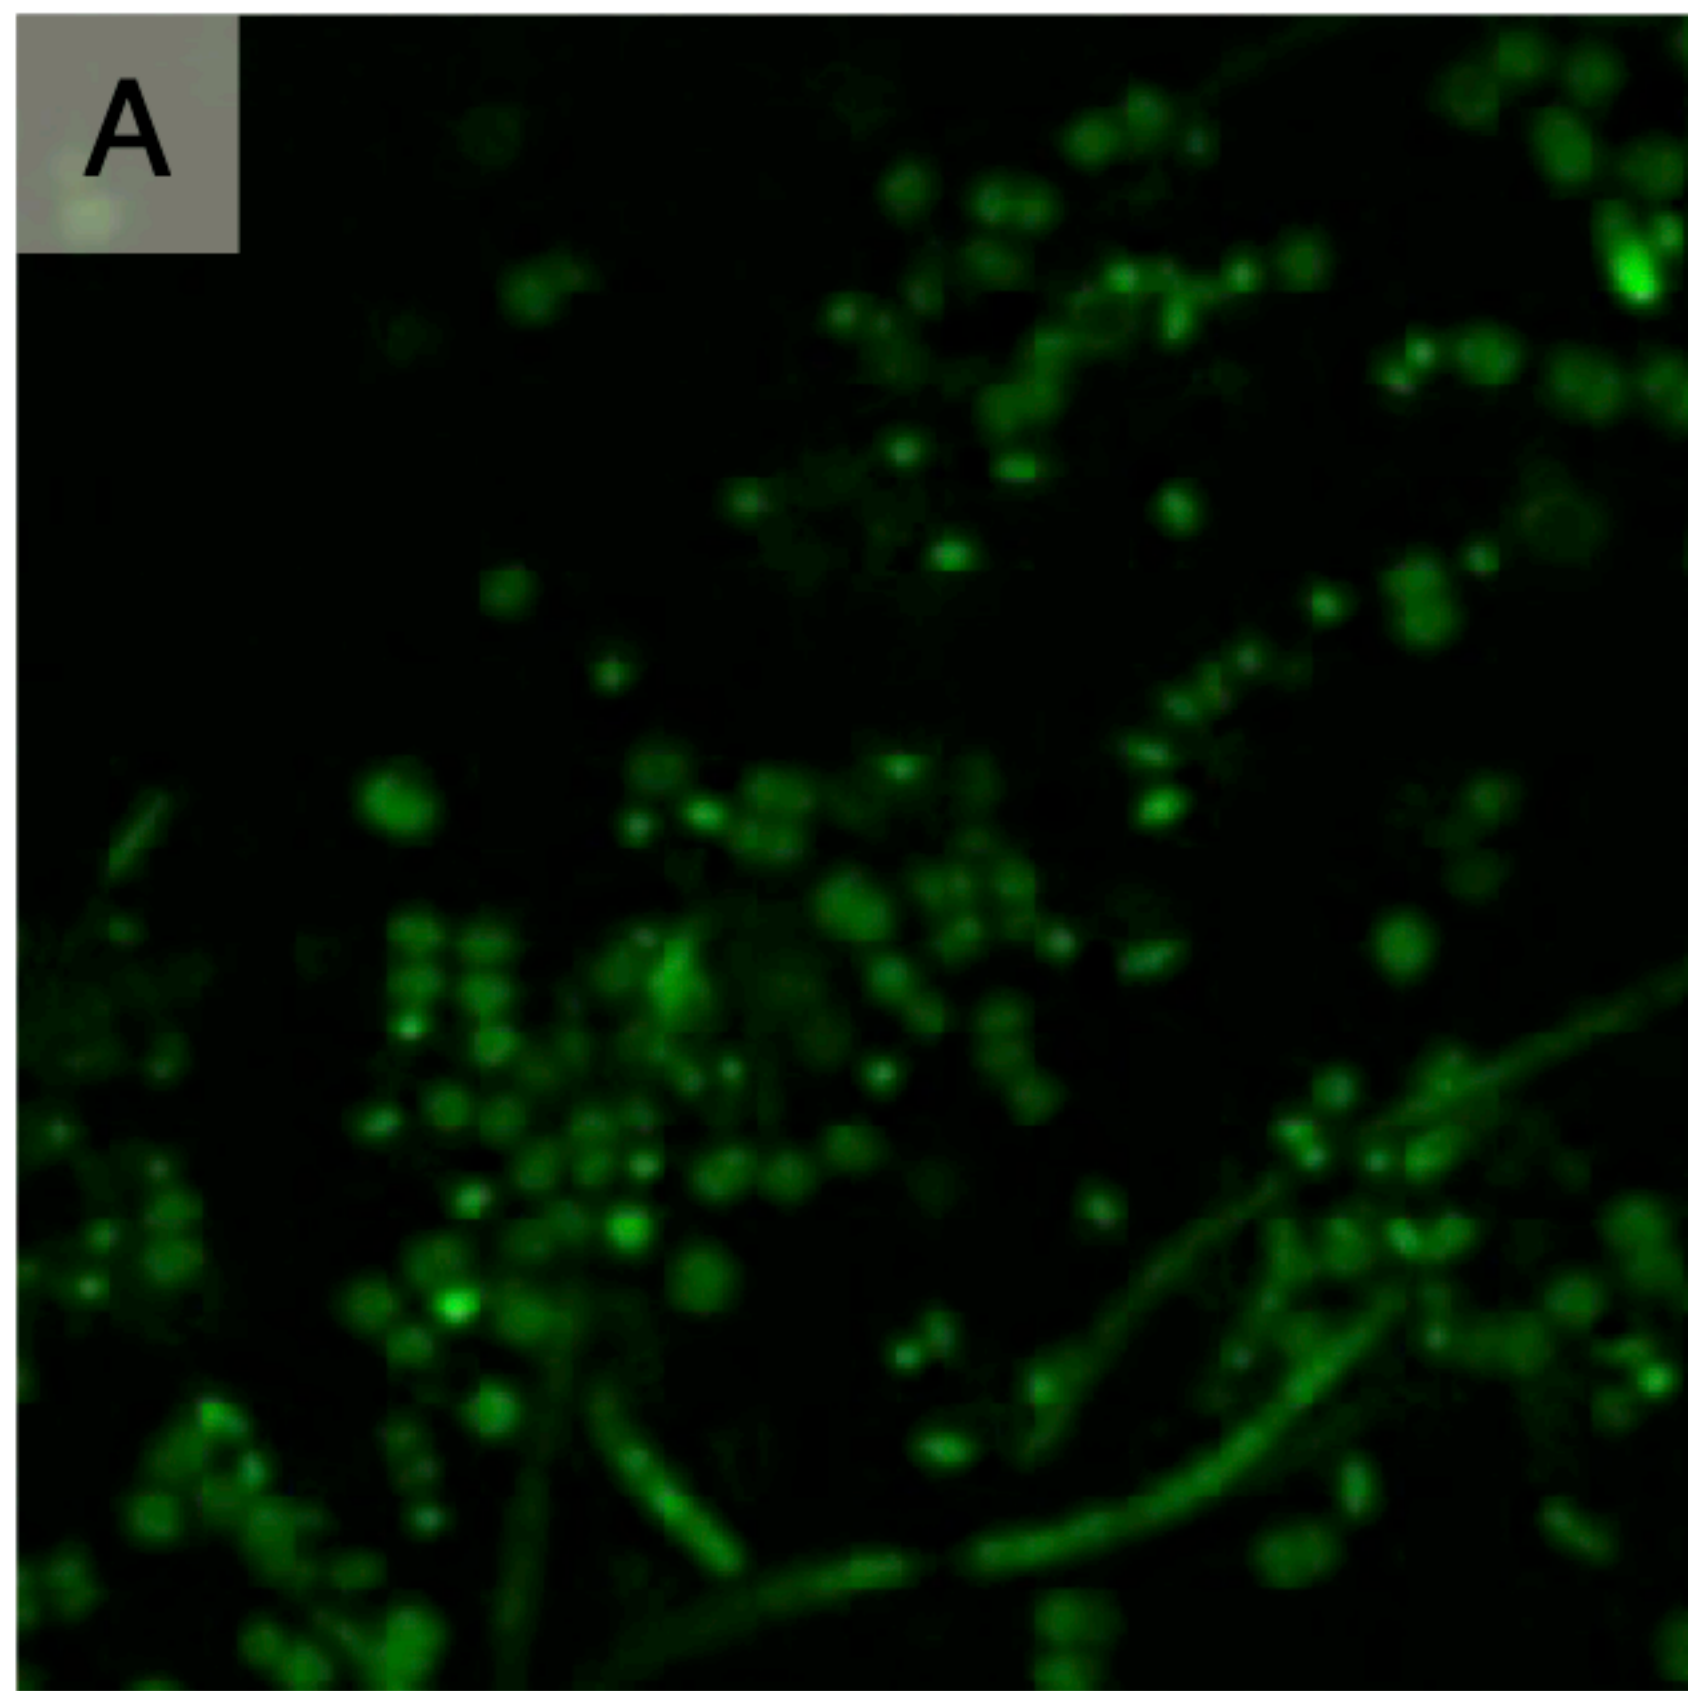

**Eub338-I**  
**(Almost-universal)**

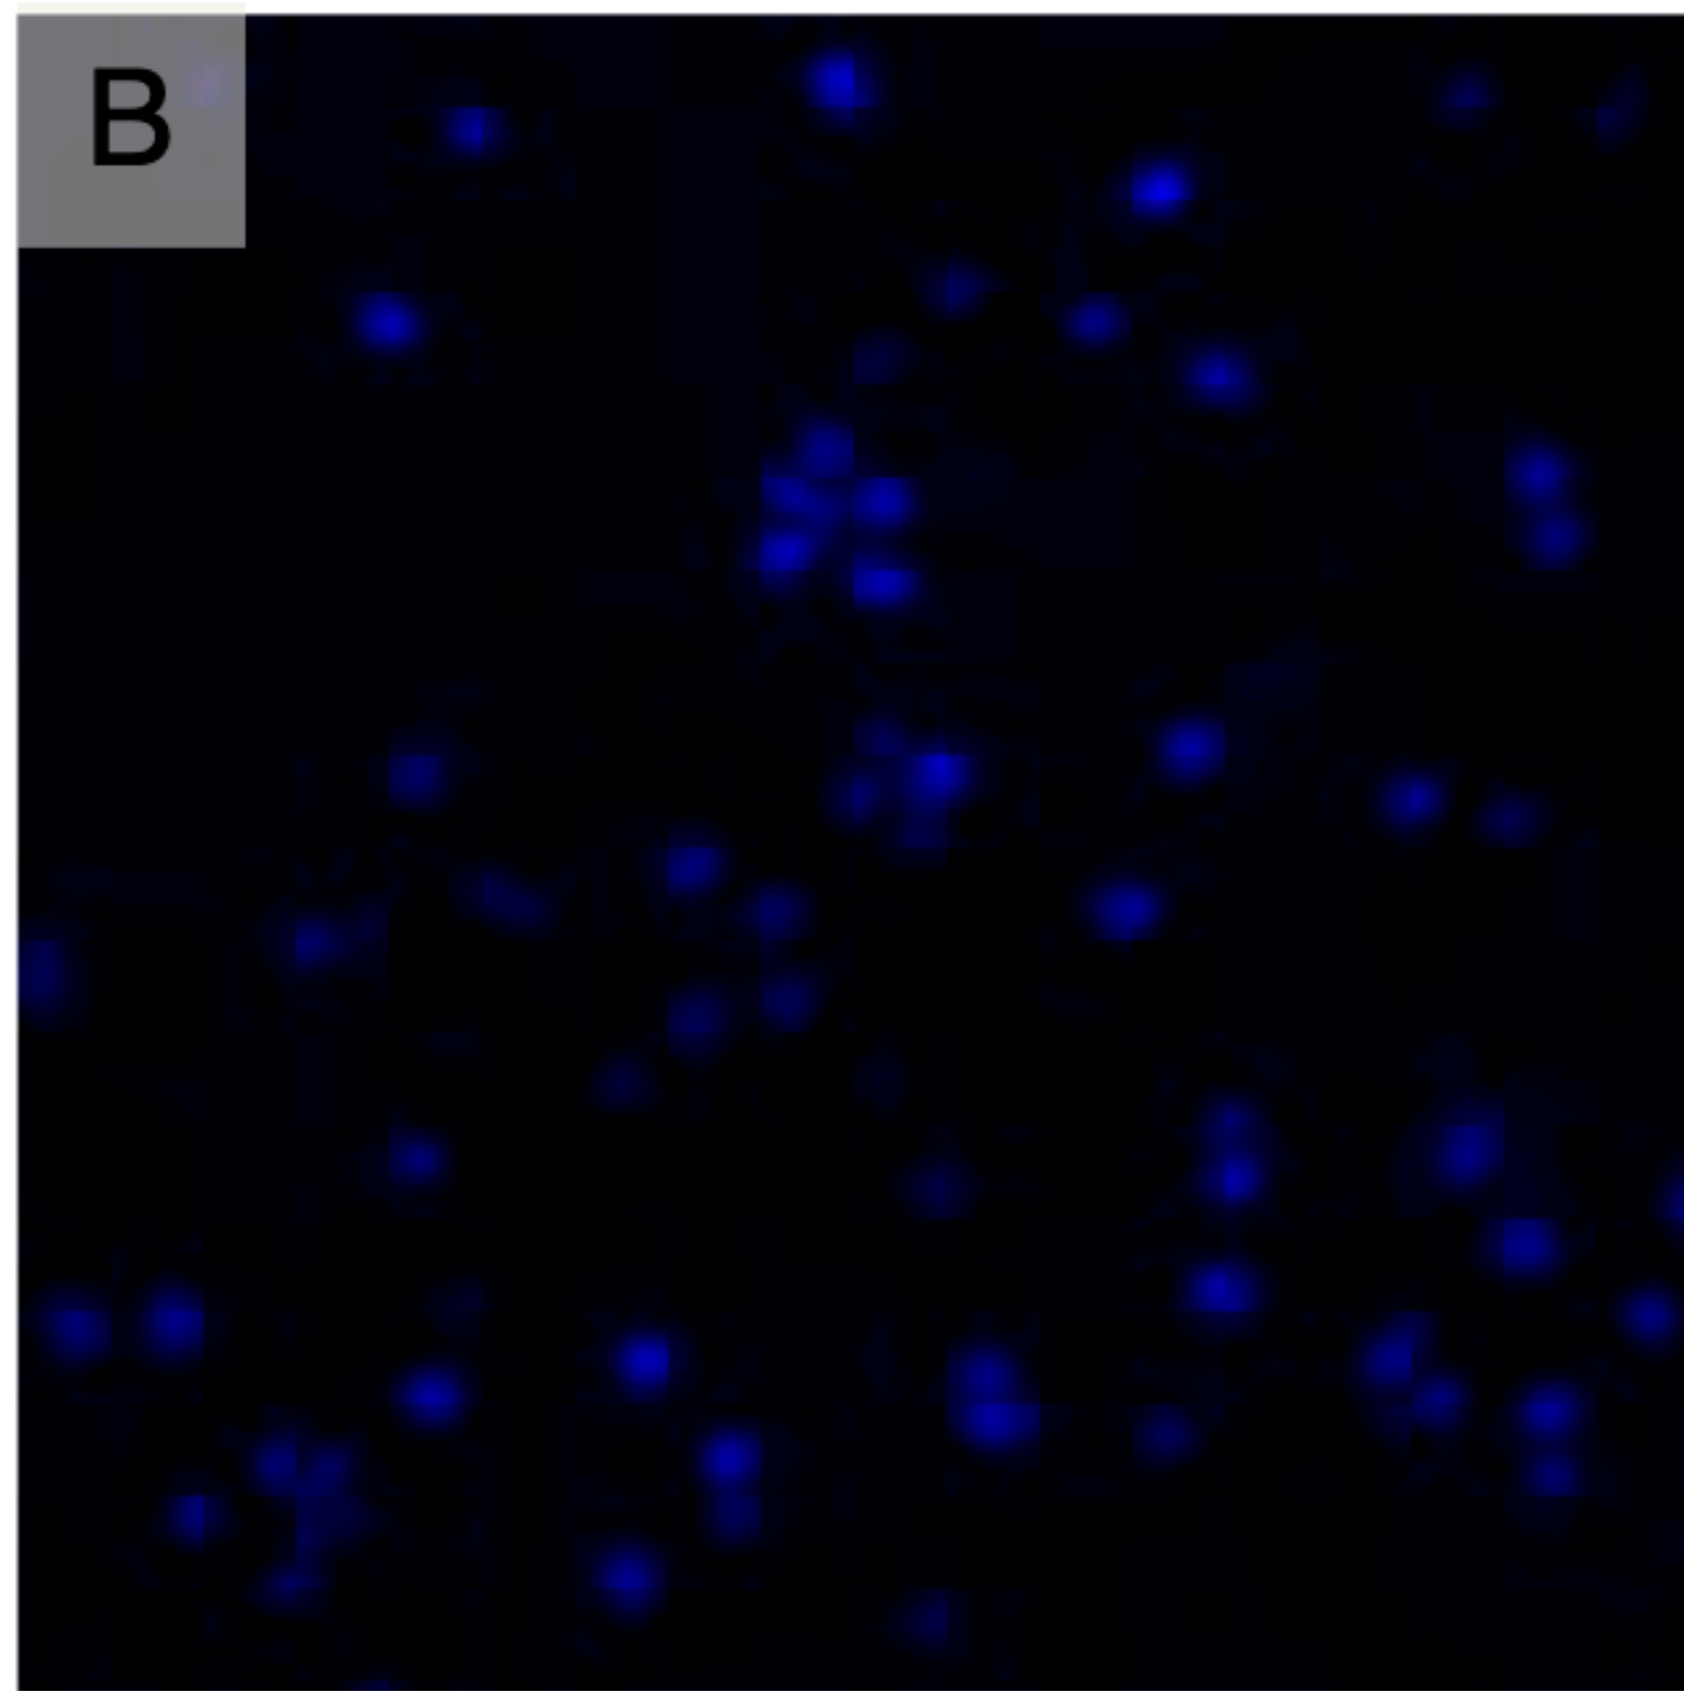

**Eub338-II & III**  
*(Verrucomicrobia-Planctomycetes)*

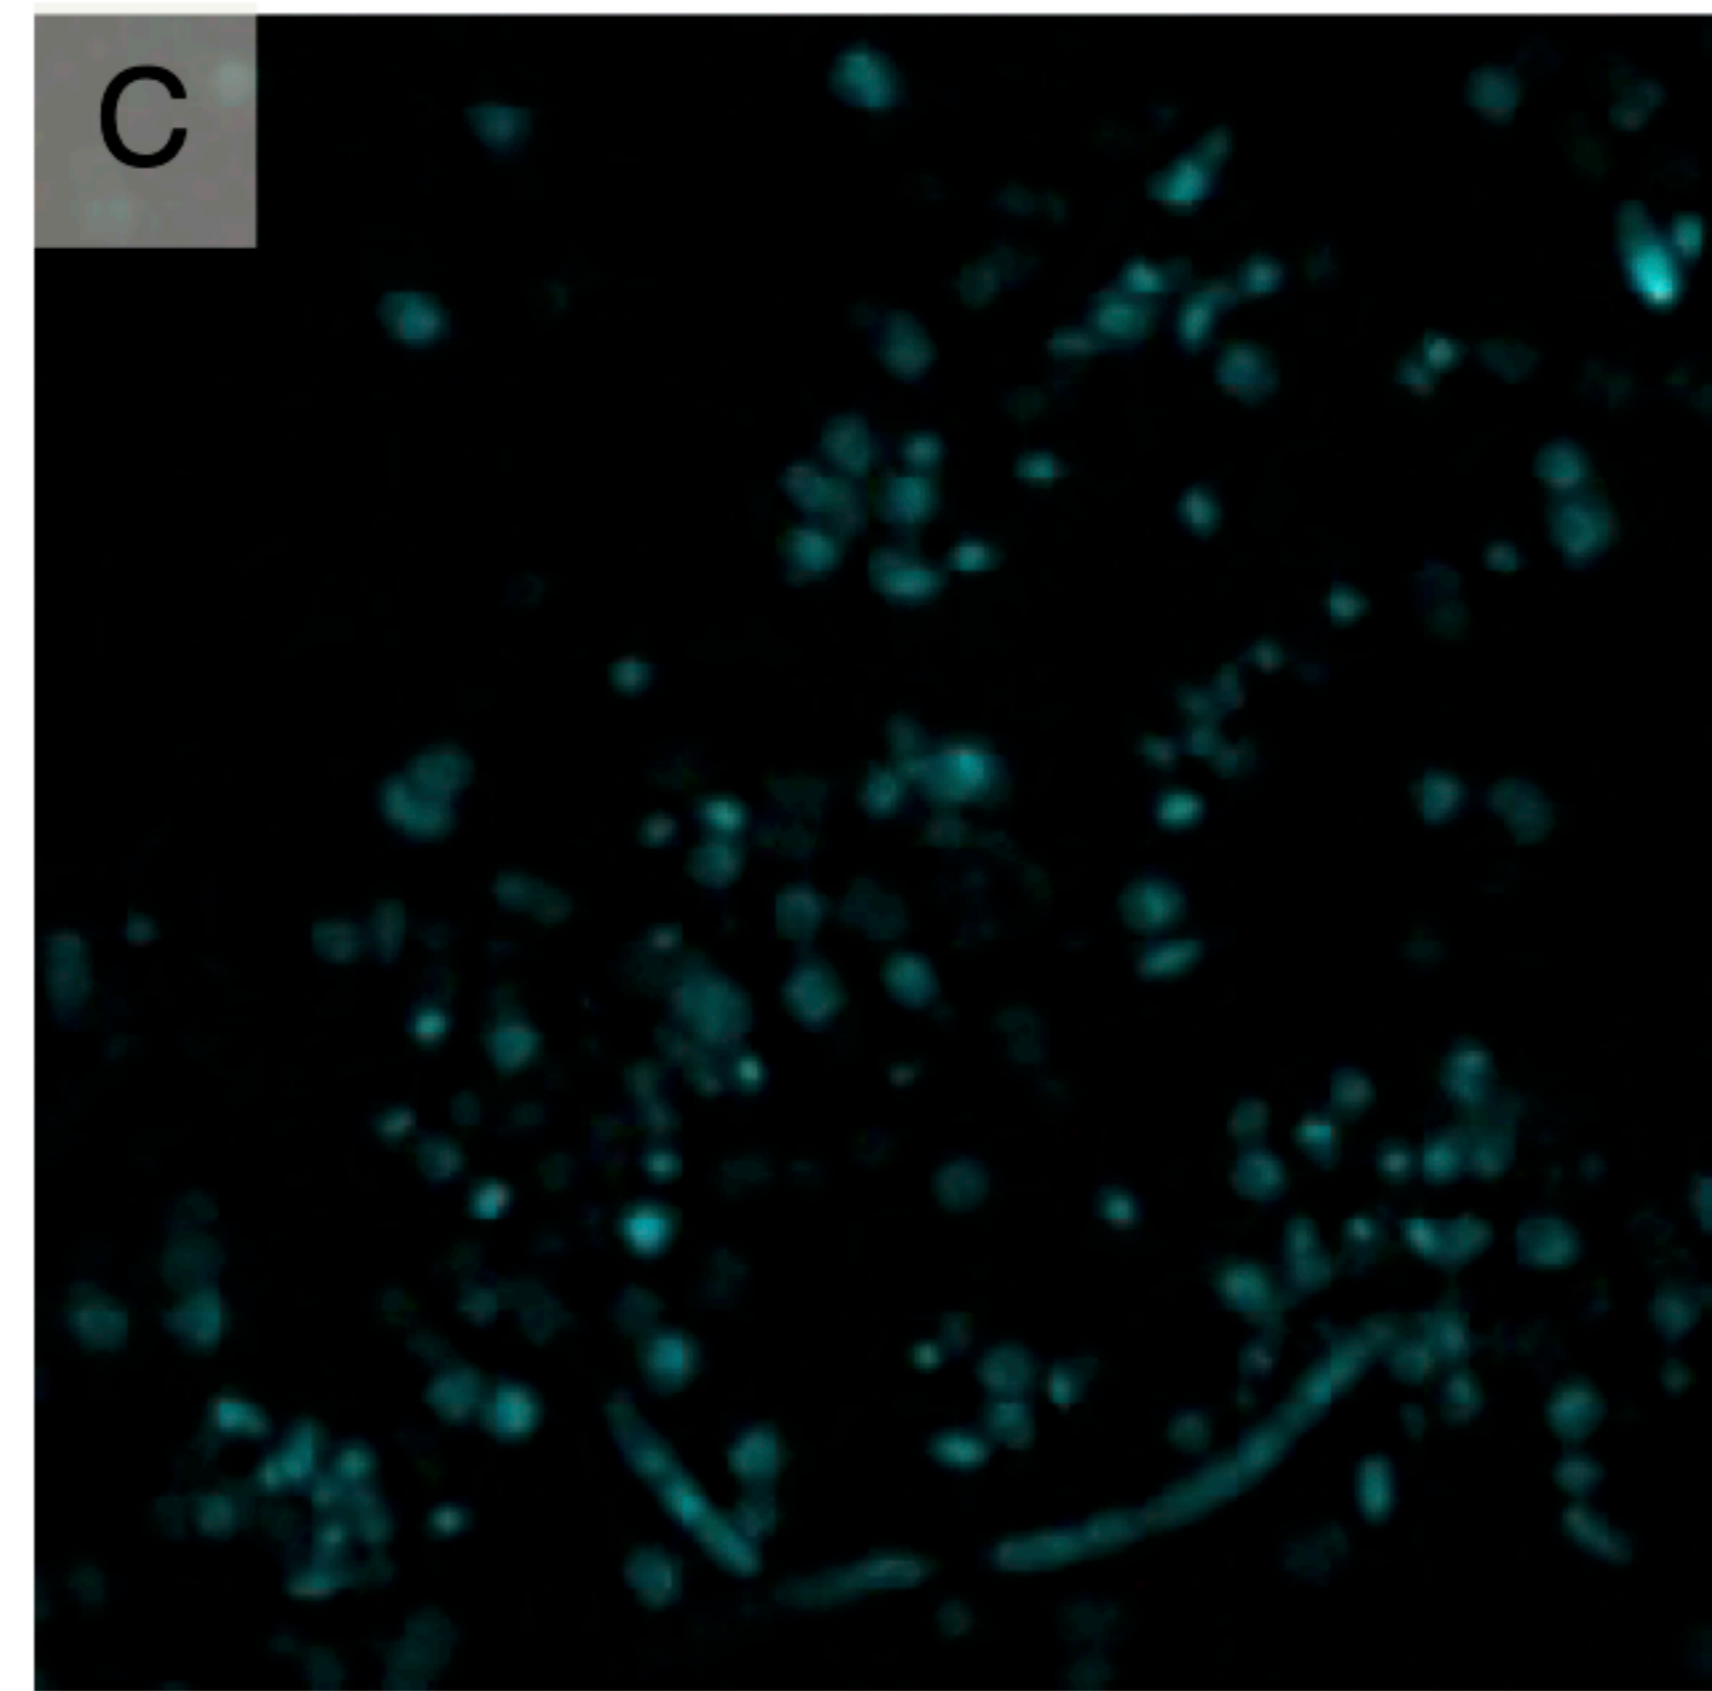

**Alf968**  
*(Alphaproteobacteria)*

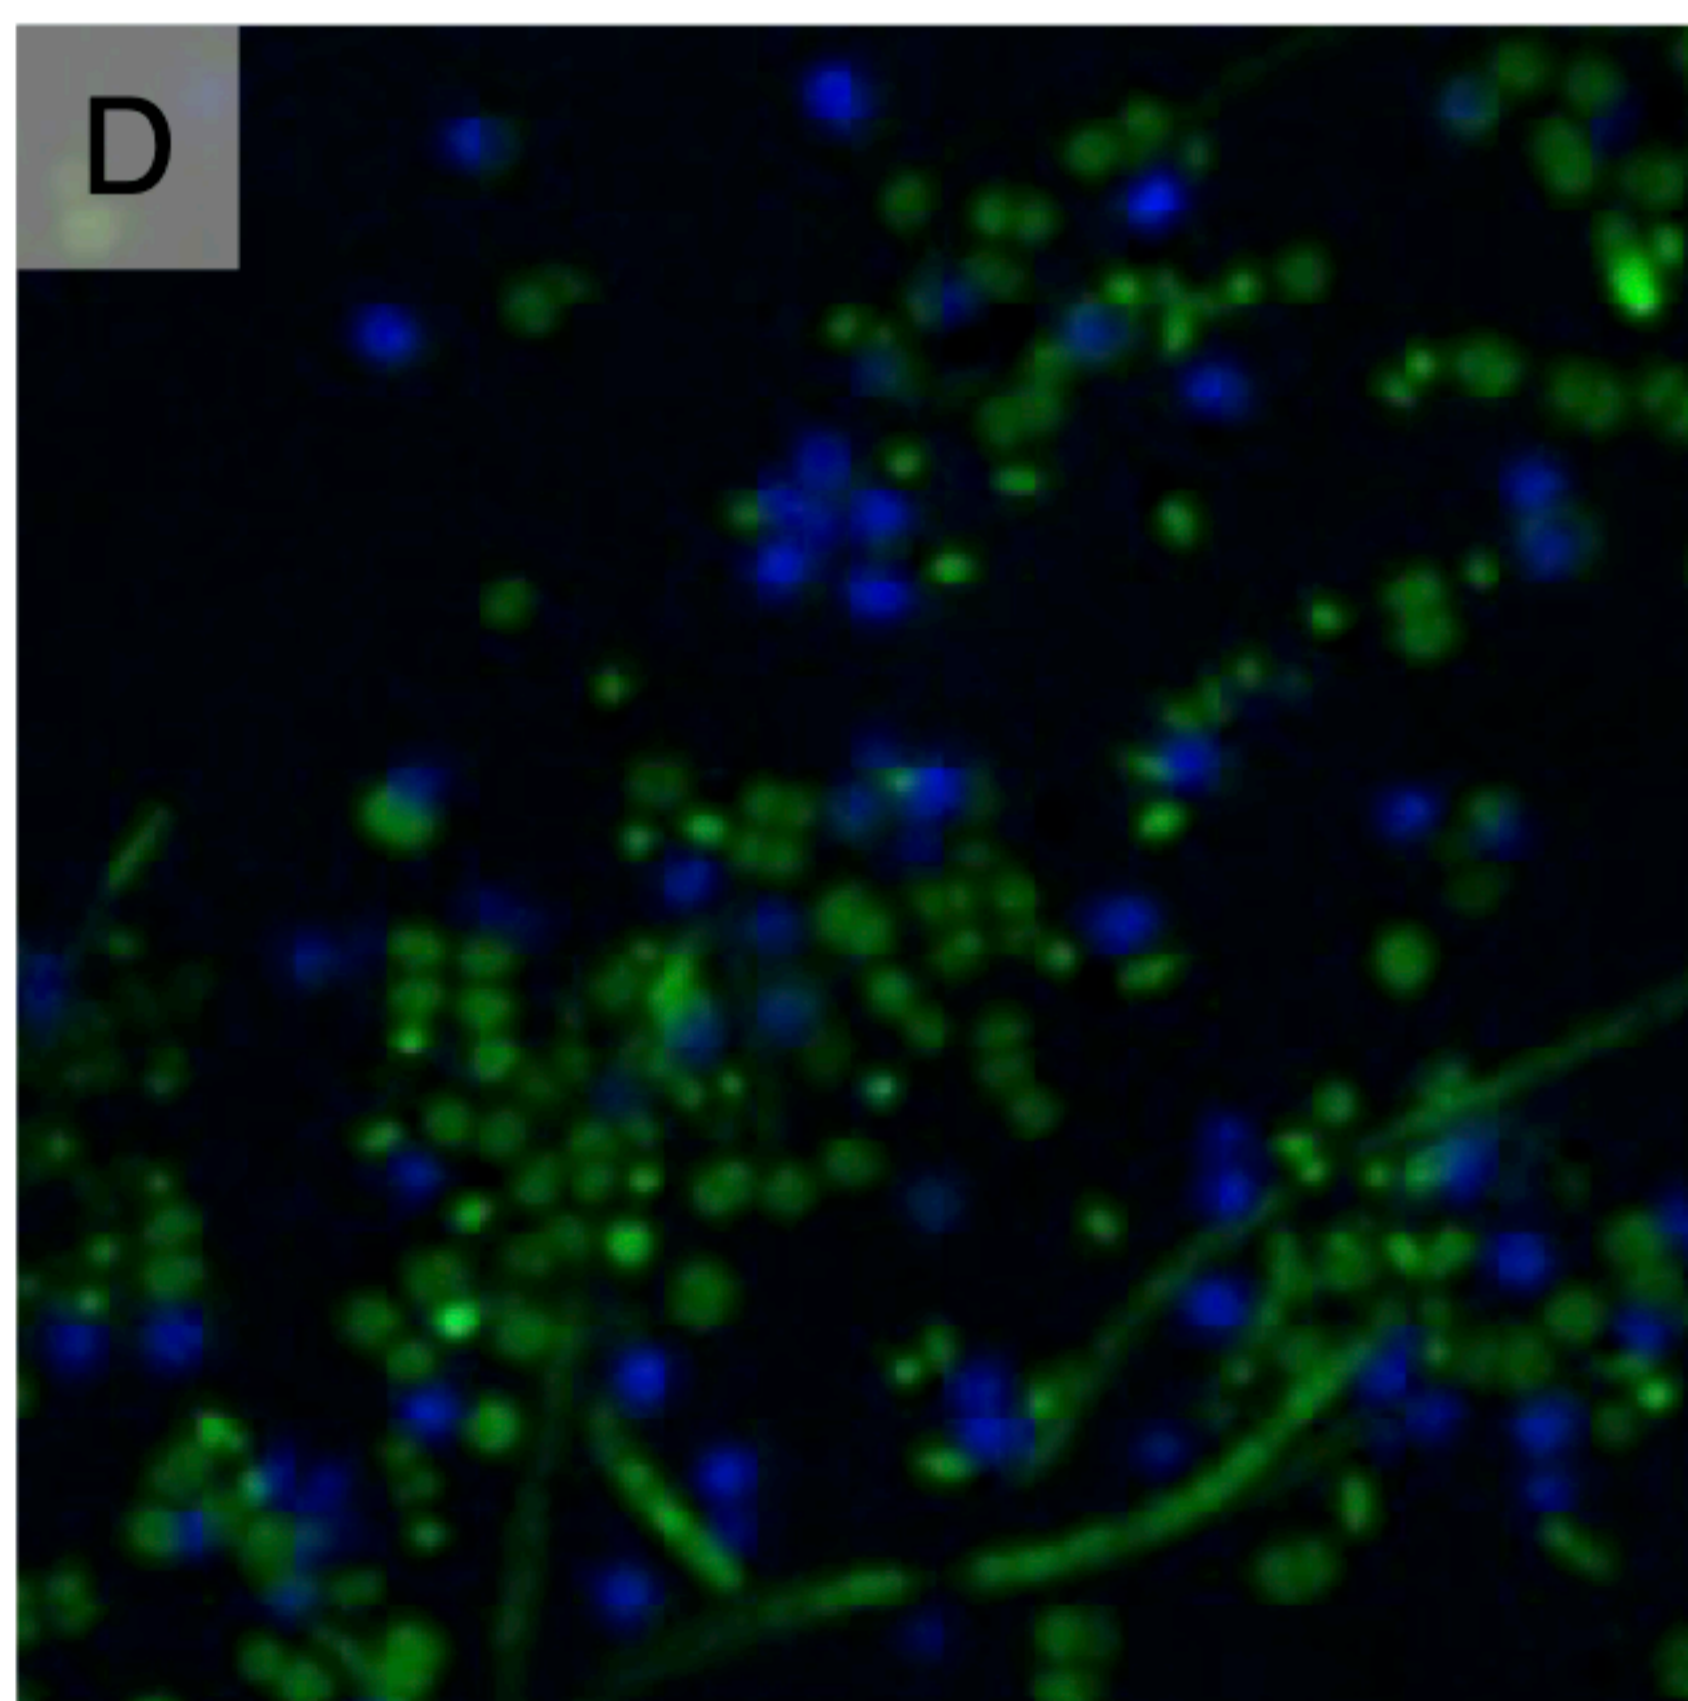

**Eub338-I (Almost-universal)**  
**Eub338-II & III**  
*(Verrucomicrobia-Planctomycetes)*

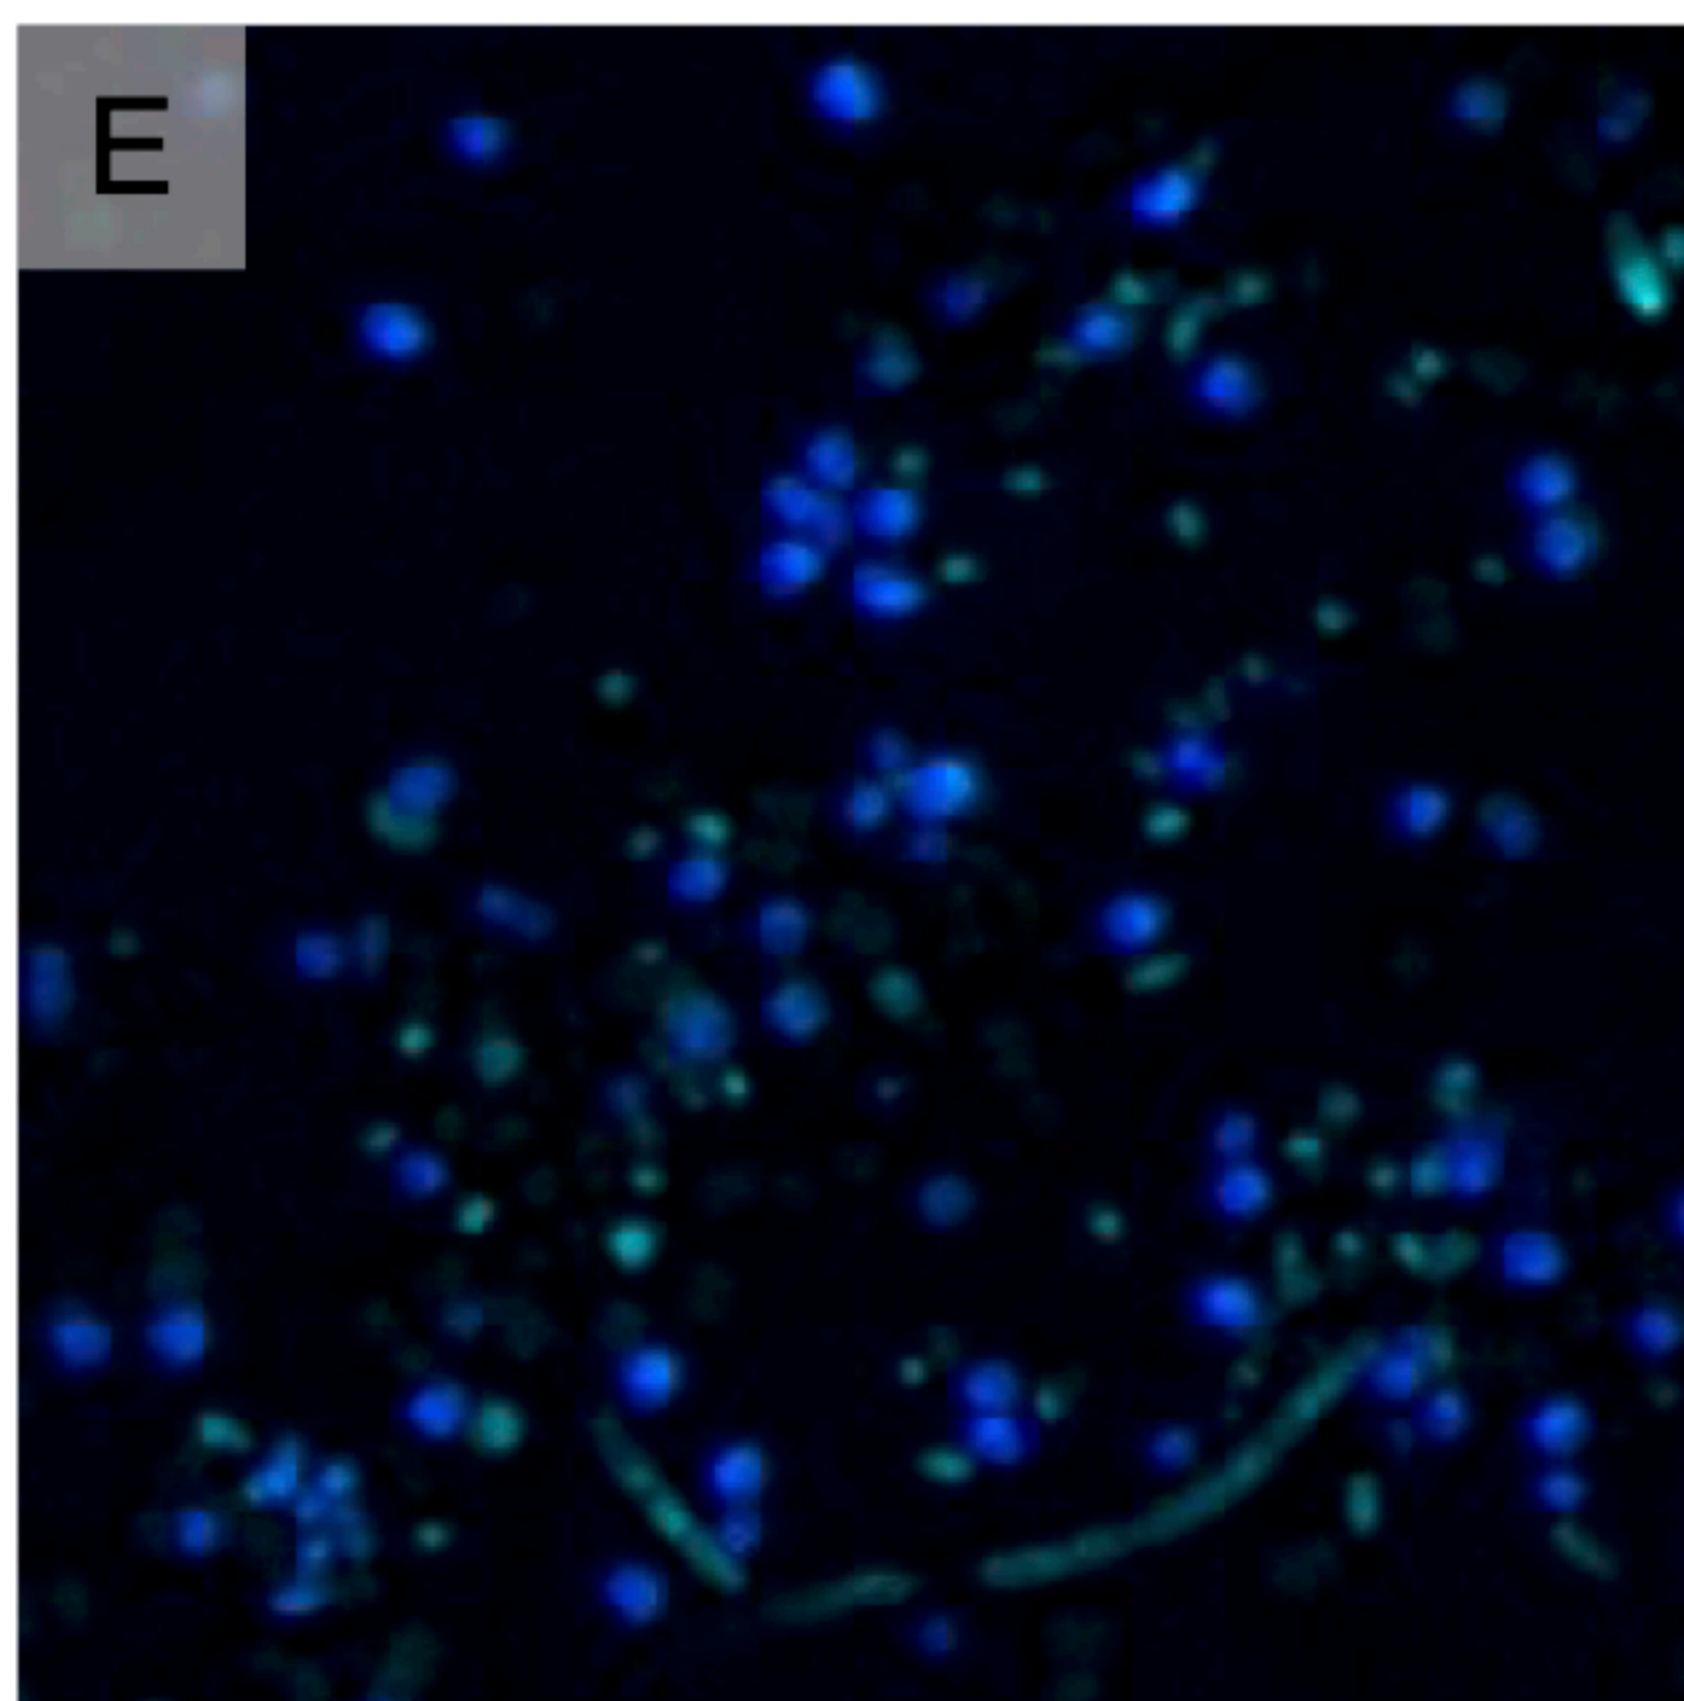

**Overlay Alphaproteobacteria**  
**+**  
**Verrucomicrobia-Plancto**

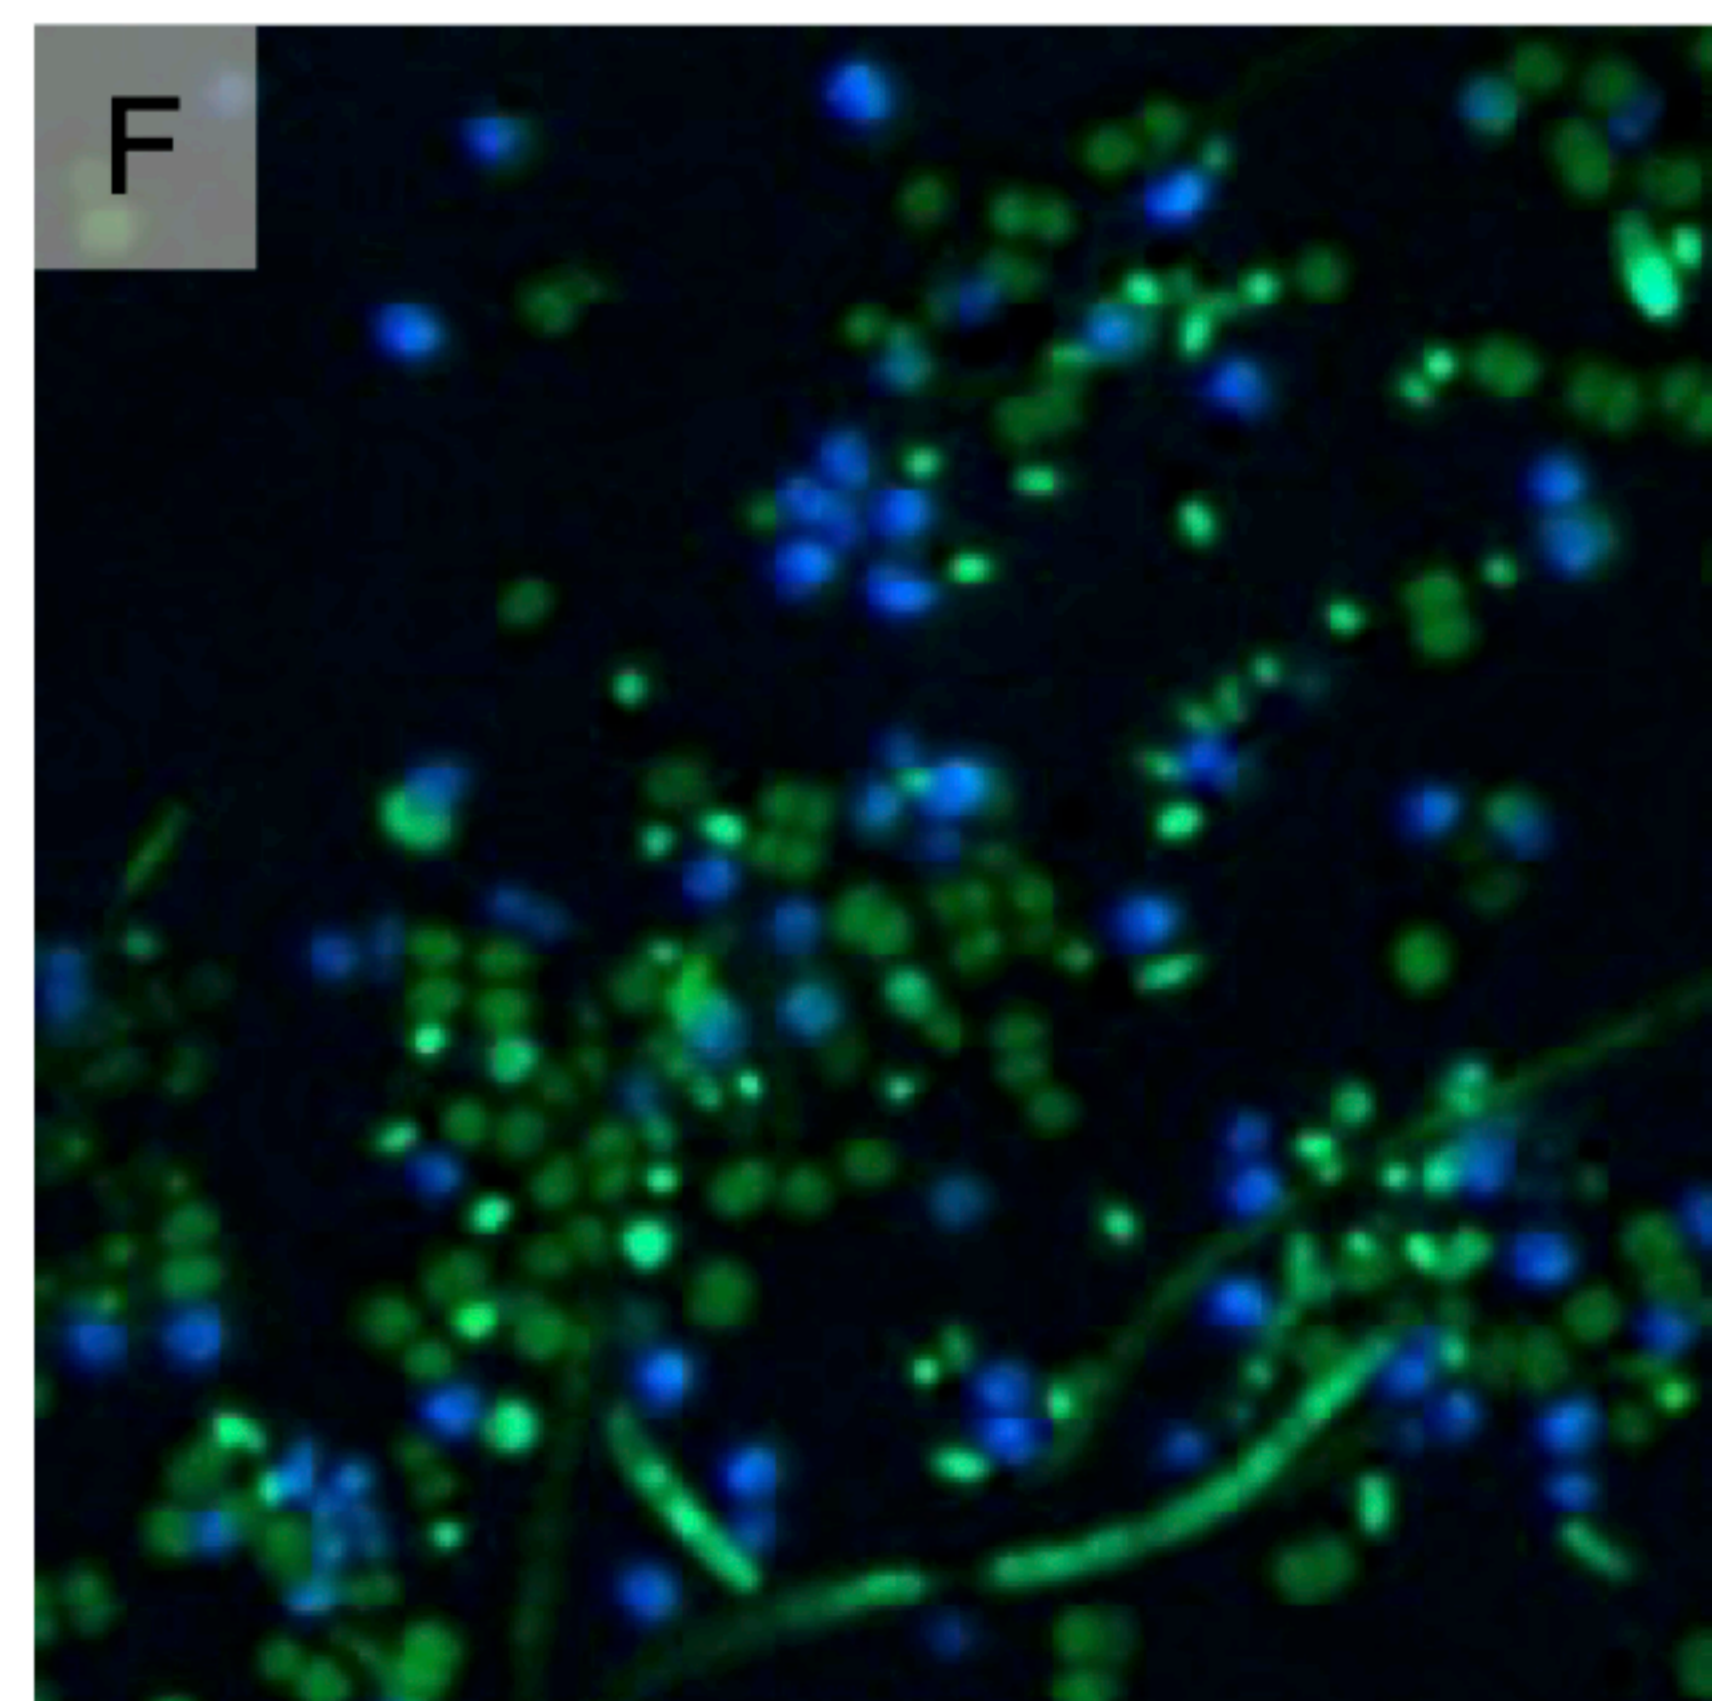

**Overlay**  
**Verrucomicrobia-Plancto**  
**Alphaproteobacteria**  
**almost-universal**
